# Supplementary material
Source: PubMed Central journal article supplement (PMC8597743)
Supplement: aac.01545-21-s0001.pdf [file aac.01545-21-s0001.pdf]

## SUPPLEMENTAL MATERIAL

### Supplemental figures

- **Fig. S1.** *MAB\_2299c* PCR amplicons from *M. abscessus* isolates with reduced susceptibility to clofazimine and bedaquiline.
- **Fig. S2.** Concentration-ranging bactericidal activity of bedaquiline with imipenem/avibactam combinations against *M. abscessus* ATCC 19977 WT parent and OM7 mutant strains.
- **Fig. S3.** Relative ATP levels, not adjusted by CFU counts, associated with exposure of *M. abscessus* ATCC 19977 WT to bedaquiline and imipenem for 1 day or 3 days in CAMHB with 0.05% Tween 80.
- **Fig. S4.** Activity of bedaquiline and imipenem against *M. abscessus* ATCC 19977 WT, with CFU-adjusted and unadjusted relative bacterial ATP levels, in CAMHB without Tween 80.
- **Fig. S5.** Relative ATP levels, not adjusted by CFU counts, associated with exposure of *M. abscessus* ATCC 19977 WT and OM7 mutant to bedaquiline and imipenem for 1 day or 3 days in CAMHB without Tween 80.
- **Fig. S6.** Activity of bedaquiline and imipenem against nutrient-starved *M. abscessus* ATCC 19977 WT and OM7 mutant, with relative bacterial ATP levels, in PBS without Tween 80.
- **Fig. S7.** Relative ATP levels, not adjusted by CFU counts, associated with exposure of nutrient-starved *M. abscessus* ATCC 19977 WT to bedaquiline and imipenem for 4 hours, 1 day, 3 days, or 7 days in PBS without Tween 80.
- **Fig. S8.** Relative ATP levels, not adjusted by CFU counts, associated with exposure of nutrient-starved *M. abscessus* OM7 mutant to bedaquiline and imipenem for 4 hours, 1 day, 3 days, or 7 days in PBS without Tween 80.
- **Fig. S9.** Activity of bedaquiline and imipenem against nutrient-starved *M. abscessus* ATCC 19977 WT in PBS with 0.05% Tween 80.
- **Fig. S10.** Activity of bedaquiline and imipenem against nutrient-starved *M. abscessus* ATCC 19977 WT in PBS without Tween 80 and with 0.05% Tween 80.
- **Fig. S11.** Concentration-ranging activity of bedaquiline and imipenem alone against intracellular (THP-1 cells) *M. abscessus* ATCC 19977 WT.

### Supplemental tables

- **Table S1.** Bedaquiline-resistant *M. abscessus* laboratory isolates.
- **Table S2.** CFU data from samples presented in Fig. 1.
- **Table S3.** CFU data from samples presented in Fig. 2.
- **Table S4.** CFU data from samples presented in Fig. S2.
- **Table S5.** CFU data from samples presented in Fig. 3.
- **Table S6.** CFU and relative light unit data from samples presented in Fig. 4 and Fig. S3.
- **Table S7.** CFU data from samples presented in Fig. 5.
- **Table S8.** CFU and relative light unit data from samples presented in Fig. 6 and Fig. S5.
- **Table S9.** CFU and relative light unit data from samples presented in Fig. S4.
- **Table S10.** CFU and relative light unit data from samples presented in Fig. 7, Fig. S6, Fig. S7, and Fig. S8.
- **Table S11.** CFU data from samples presented in Fig. 8 and Fig. S9.
- **Table S12.** CFU data from samples presented in Fig. S10.
- **Table S13.** CFU data from intracellular samples presented in Fig. 9 and Fig. S11.

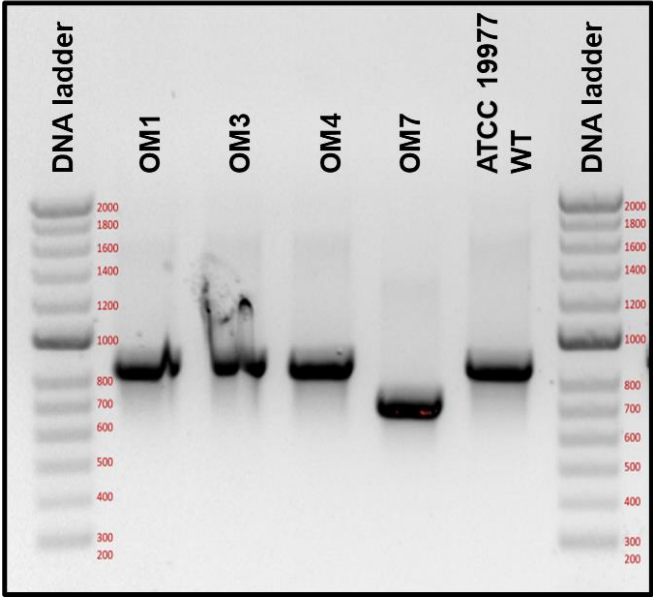

**Fig. S1. *MAB\_2299c* PCR amplicons from *M. abscessus* isolates with reduced susceptibility to clofazimine and bedaquiline.** The expected amplicon size for the *M. abscessus* ATCC 19977 WT parent strain was 796 bp.

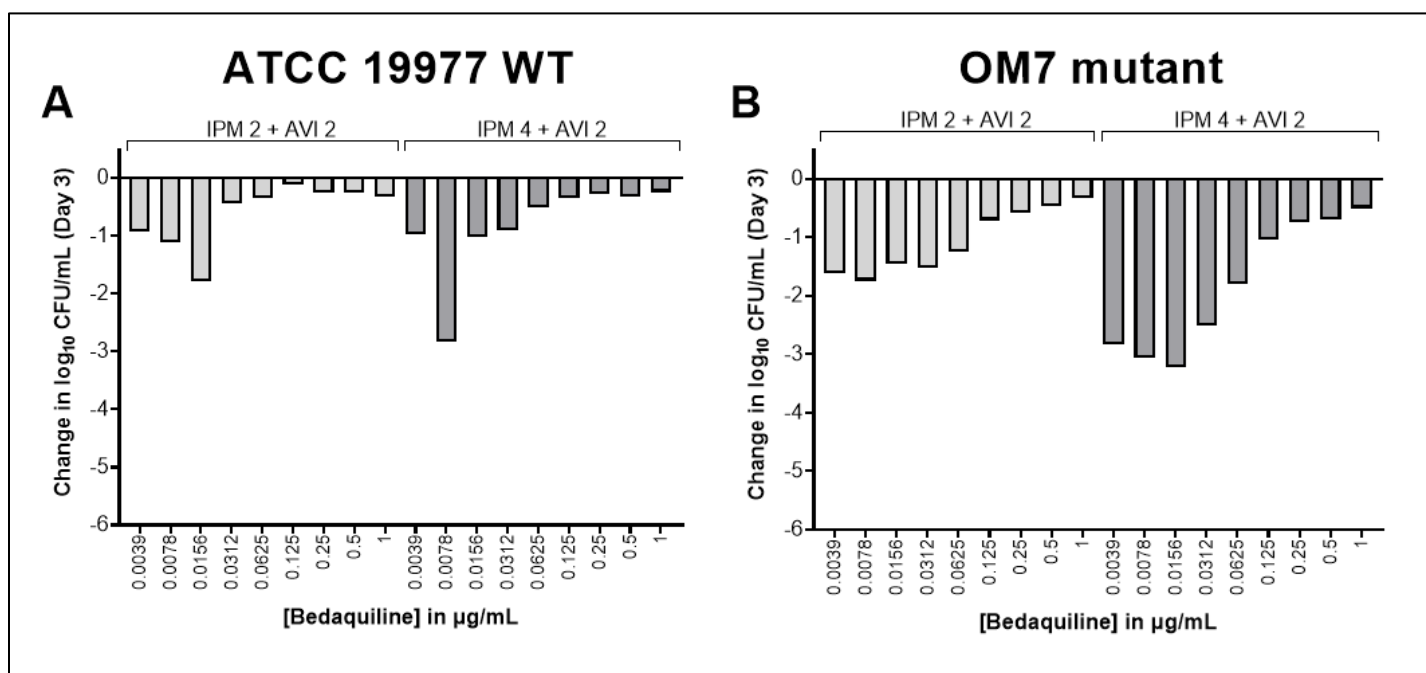

**Fig. S2. Concentration-ranging bactericidal activity of bedaquiline with imipenem (IPM)/avibactam (AVI) combinations against *M. abscessus* ATCC 19977 WT parent (A) and OM7 mutant (B) strains.** The change in log<sub>10</sub> CFU/mL after 3 days of drug exposure relative to Day 0 is presented for each drug/strain set. Assay medium was CAMHB with 0.05% Tween 80. The number after each IPM and AVI abbreviation represents the concentration µg/mL. The Day 0 bacterial concentrations were 6.13 and 6.22 log<sub>10</sub> CFU/mL for WT and OM7 mutant strains, respectively. CFU values are provided in **Table S4**.

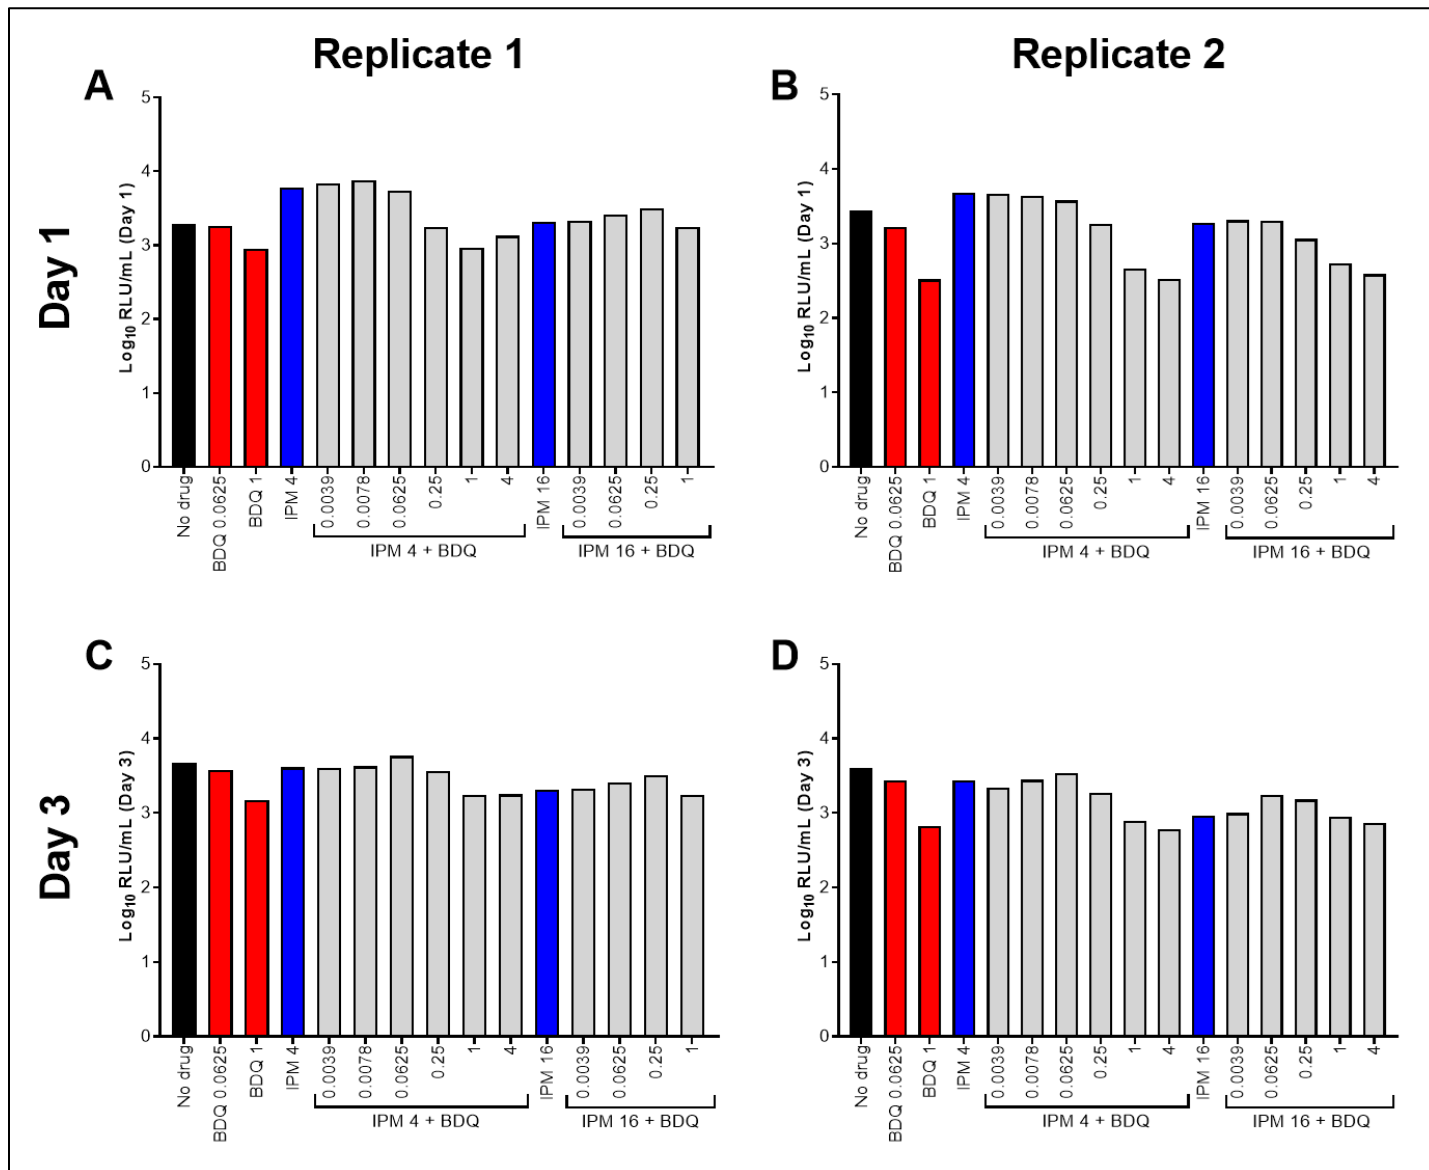

**Fig. S3. Relative ATP levels, not adjusted by CFU counts, associated with exposure of *M. abscessus* ATCC 19977 WT to bedaquiline (BDQ) and imipenem (IPM) for 1 day (A,B) or 3 days (C,D) in CAMHB with 0.05% Tween 80.** Replicate 1 (A,C) is the experiment presented in Fig. 4A,C. Replicate 2 (B,D) is the experiment presented in Fig. 4B,D. ATP levels are indicated by relative light units (RLU)/CFU from samples. Black bars represent the no drug control; red bars indicate BDQ only samples; blue bars represent IPM only samples, and gray bars indicate IPM plus BDQ samples. The number after each drug abbreviation represents the concentration in  $\mu\text{g/mL}$  (for gray bars the BDQ concentration in  $\mu\text{g/mL}$  is presented under each bar). RLU values are provided in Table S6.

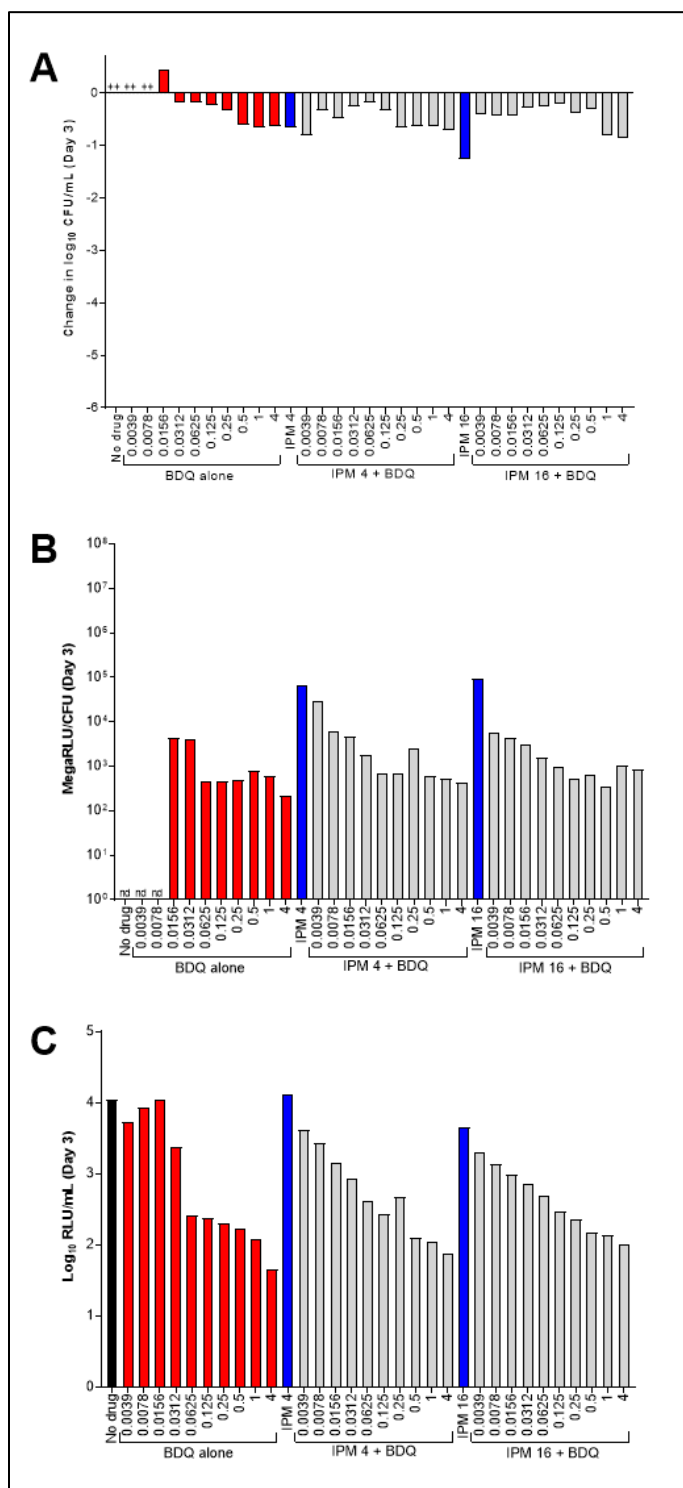

**Fig. S4. Activity of bedaquiline (BDQ) and imipenem (IPM) against *M. abscessus* ATCC 19977 WT (A), with CFU-adjusted (B) and unadjusted (C) relative bacterial ATP levels, in CAMHB without Tween 80.** These data are from a second biological replicate of the experiment in Fig. 6. The changes in log<sub>10</sub> CFU/mL after 3 days of drug exposure relative to Day 0 are presented in panel A. CFU-adjusted ATP levels, indicated by relative light units (RLU)/CFU from samples after 3 days of drug exposure, are presented in panel B; relative ATP levels, not adjusted by CFU counts, are presented in panel C. Black bars indicate the no drug control; red bars indicate BDQ only samples; blue bars represent IPM only samples, and gray bars indicate IPM + BDQ samples. The number after the IPM abbreviation represents the concentration in µg/mL; for red and gray bars, the BDQ concentration in µg/mL is under each bar. The Day 0 bacterial concentration for panel A was 5.95 log<sub>10</sub> CFU/mL. CFU and RLU values are provided in Table S9.

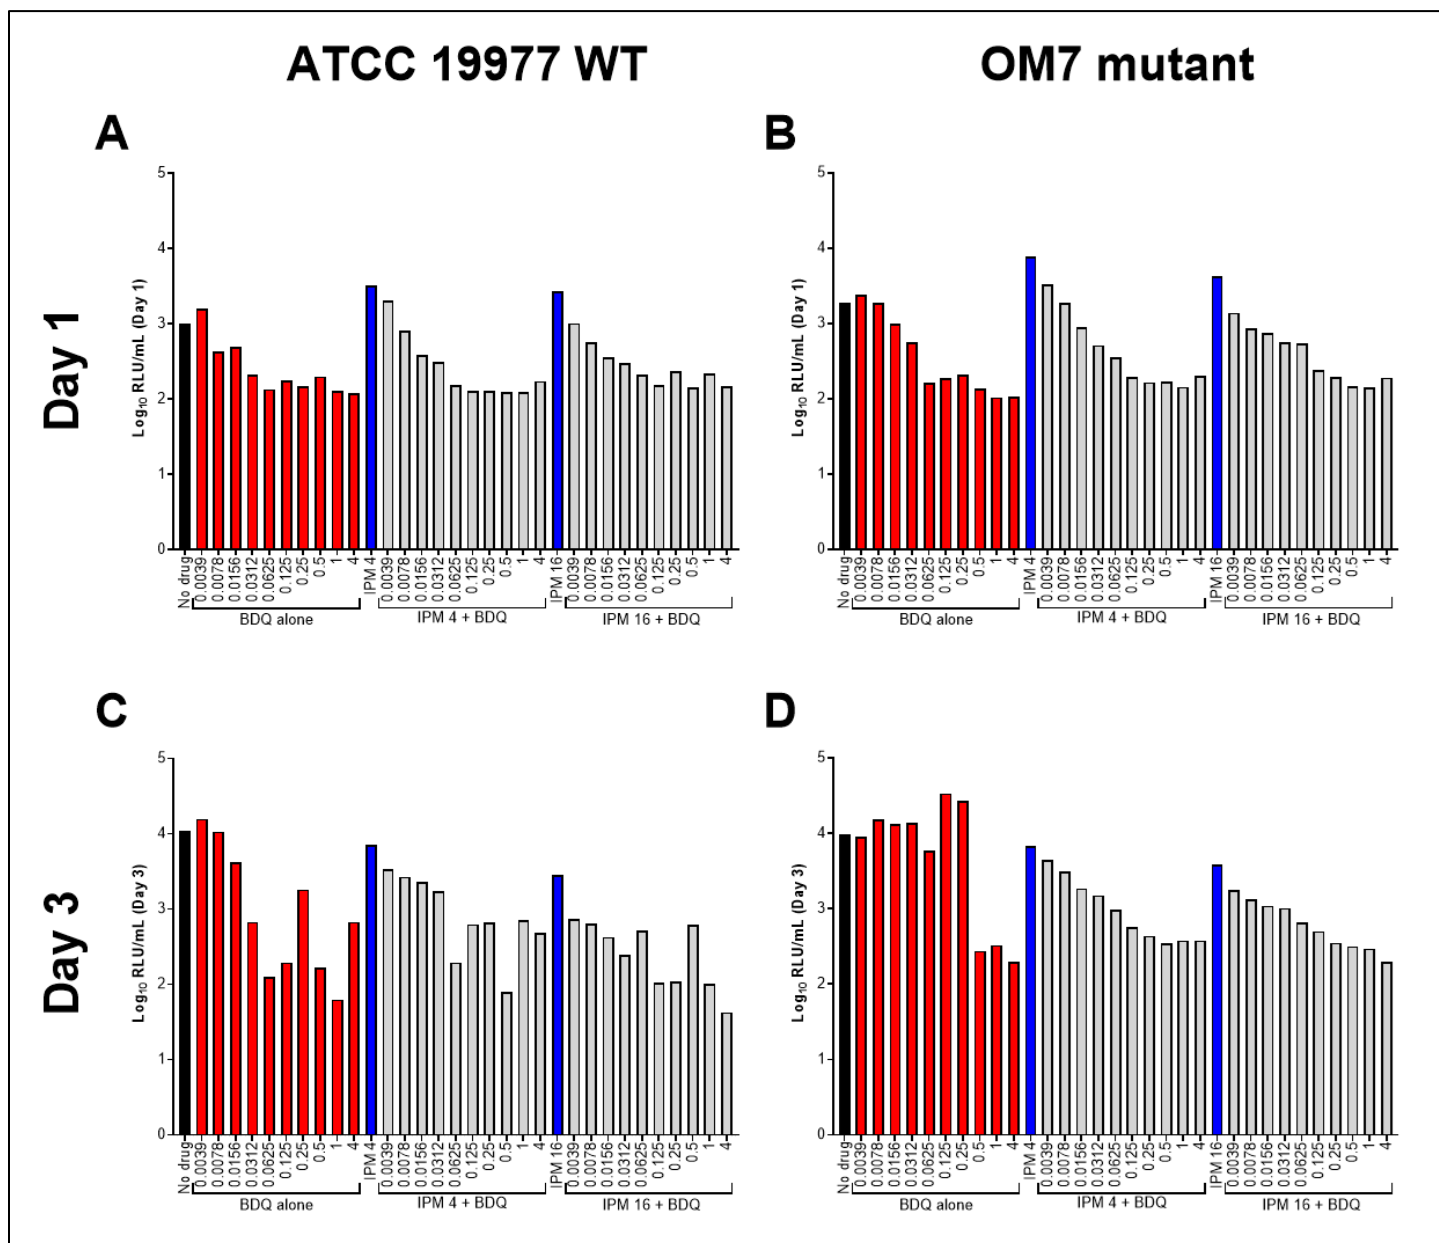

**Fig. S5. Relative ATP levels, not adjusted by CFU counts, associated with exposure of *M. abscessus* ATCC 19977 WT (A,C) and OM7 mutant (B,D) to bedaquiline (BDQ) and imipenem (IPM) for 1 day (A,B) or 3 days (C,D) in CAMHB without Tween 80.** ATP levels are indicated by relative light units (RLU)/CFU from samples. Black bars represent the no drug control; red bars indicate BDQ only samples; blue bars represent IPM only samples, and gray bars indicate IPM plus BDQ samples. The number after each drug abbreviation represents the concentration in µg/mL (for gray bars the BDQ concentration in µg/mL is presented under each bar). RLU values are provided in **Table S8**.

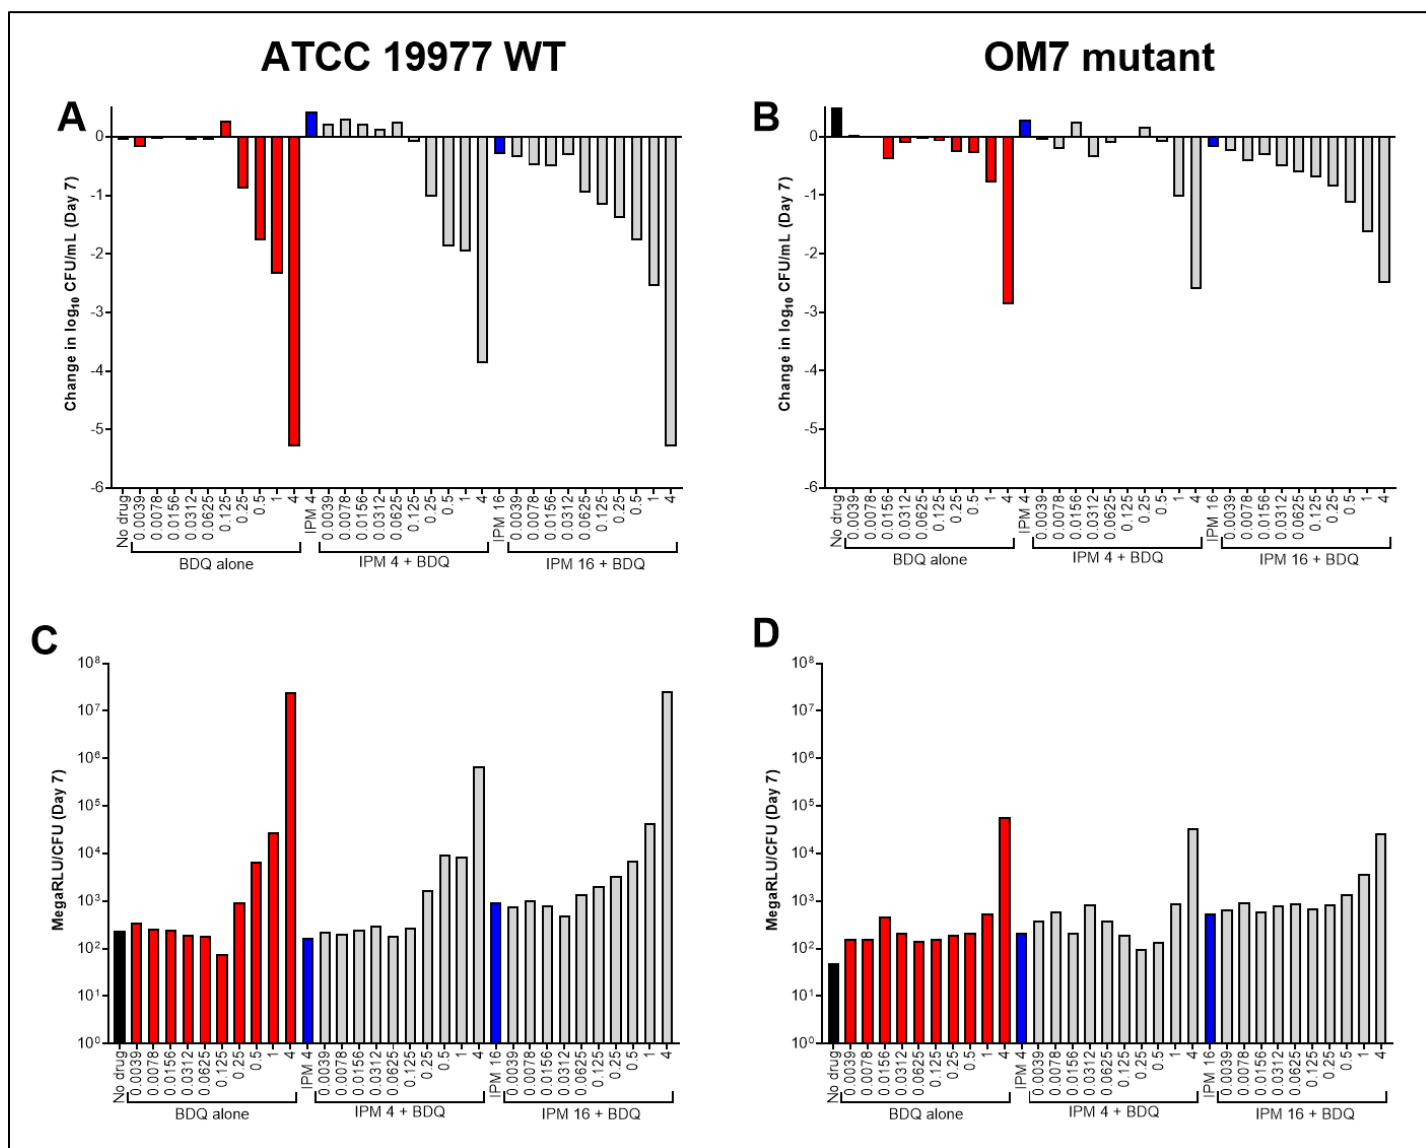

**Fig. S6. Activity of bedaquiline (BDQ) and imipenem (IPM) against nutrient-starved *M. abscessus* ATCC 19977 WT (A) and OM7 mutant (B), with relative bacterial ATP levels (C,D), in PBS without Tween 80.** Bacteria were nutrient-starved in PBS for 14 days prior to drug exposure. The changes in  $\log_{10}$  CFU/mL after 7 days of drug exposure relative to Day 0 are presented in panels A and B; CFU-adjusted ATP levels, indicated by relative fluorescence units (RLU)/CFU from samples, after 7 days of drug exposure are presented in panels C and D. Black bars indicate the no drug control; red bars indicate BDQ only samples; blue bars represent IPM only samples, and gray bars indicate IPM + BDQ samples. The number after the IPM abbreviation represents the concentration in  $\mu$ g/mL; for red and gray bars, the BDQ concentration in  $\mu$ g/mL is under each bar. Data after 3 days of drug exposure are presented in **Fig. 7**. RLU/mL (not adjusted for CFUs) for WT and OM7 are presented in **Fig. S7** and **Fig. S8**, respectively. The Day 0 bacterial concentration for panels A and B was 6.25 and 6.29  $\log_{10}$  CFU/mL, respectively. CFU and RLU values are provided in **Table S10**.

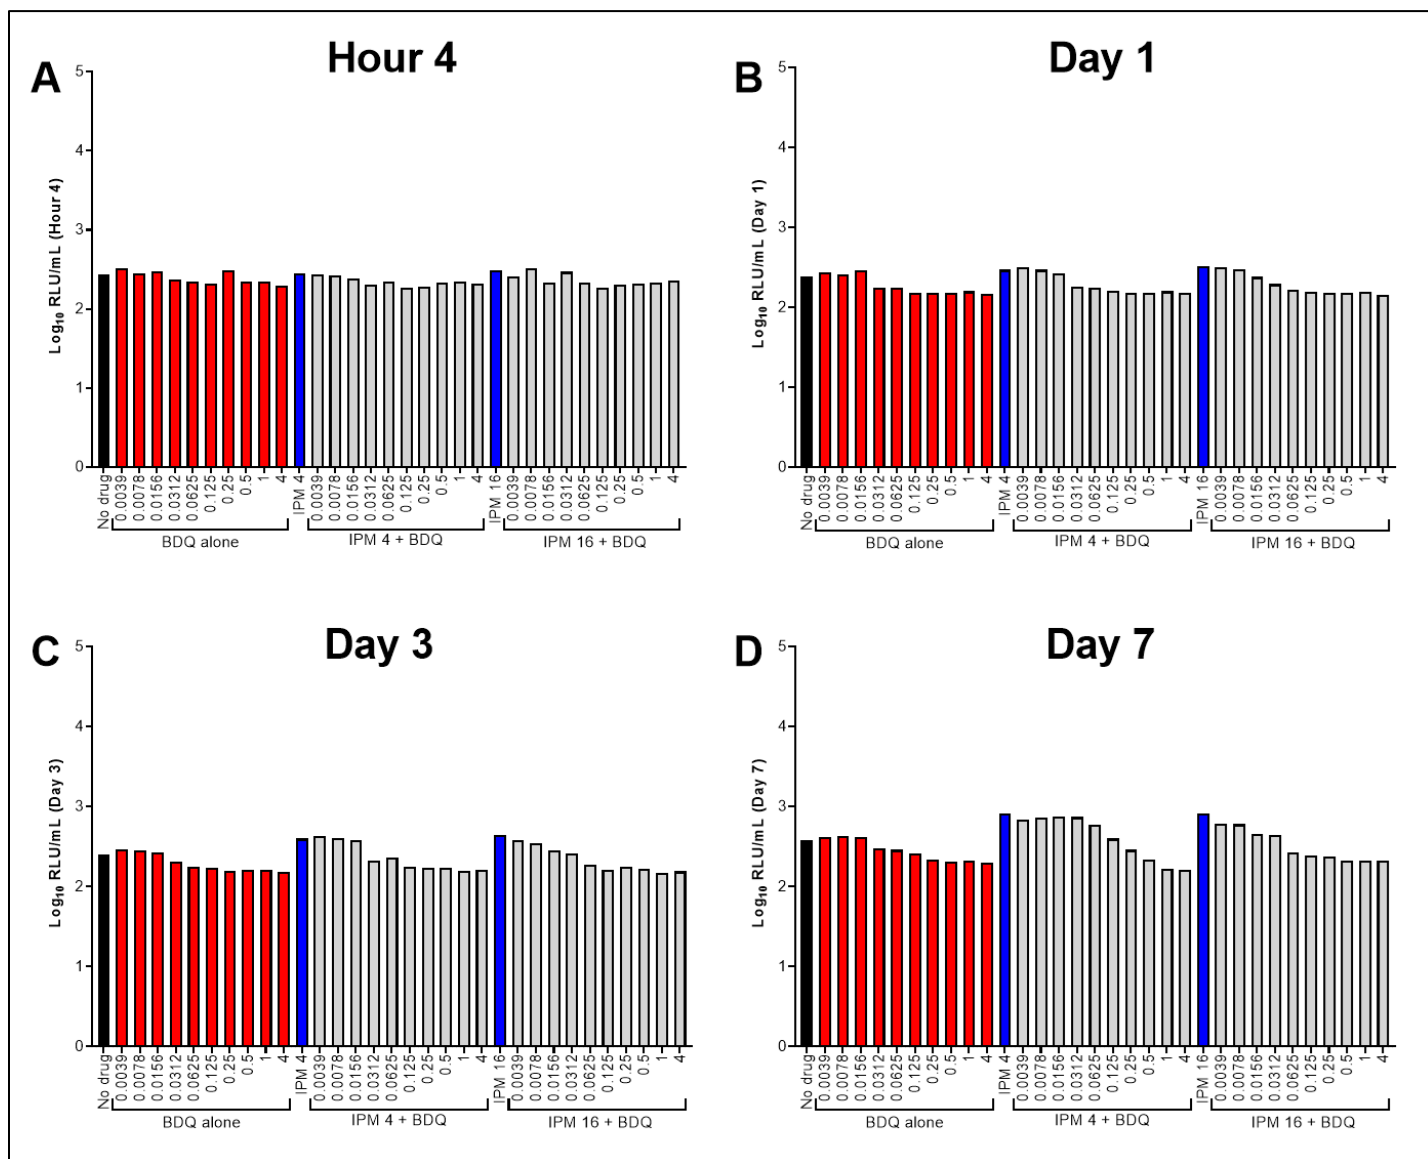

**Fig. S7. Relative ATP levels, not adjusted by CFU counts, associated with exposure of nutrient-starved *M. abscessus* ATCC 19977 WT to bedaquiline (BDQ) and imipenem (IPM) for 4 hours (A), 1 day (B), 3 days (C), or 7 days (D) in PBS without Tween 80.** Bacteria were nutrient-starved in PBS for 14 days prior to drug exposure. ATP levels are indicated by relative light units (RLU)/CFU from samples. Black bars represent the no drug control; red bars indicate BDQ only samples; blue bars represent IPM only samples, and gray bars indicate IPM plus BDQ samples. The number after each drug abbreviation represents the concentration in  $\mu\text{g/mL}$  (for gray bars the BDQ concentration in  $\mu\text{g/mL}$  is presented under each bar). RLU values are provided in **Table S10**.



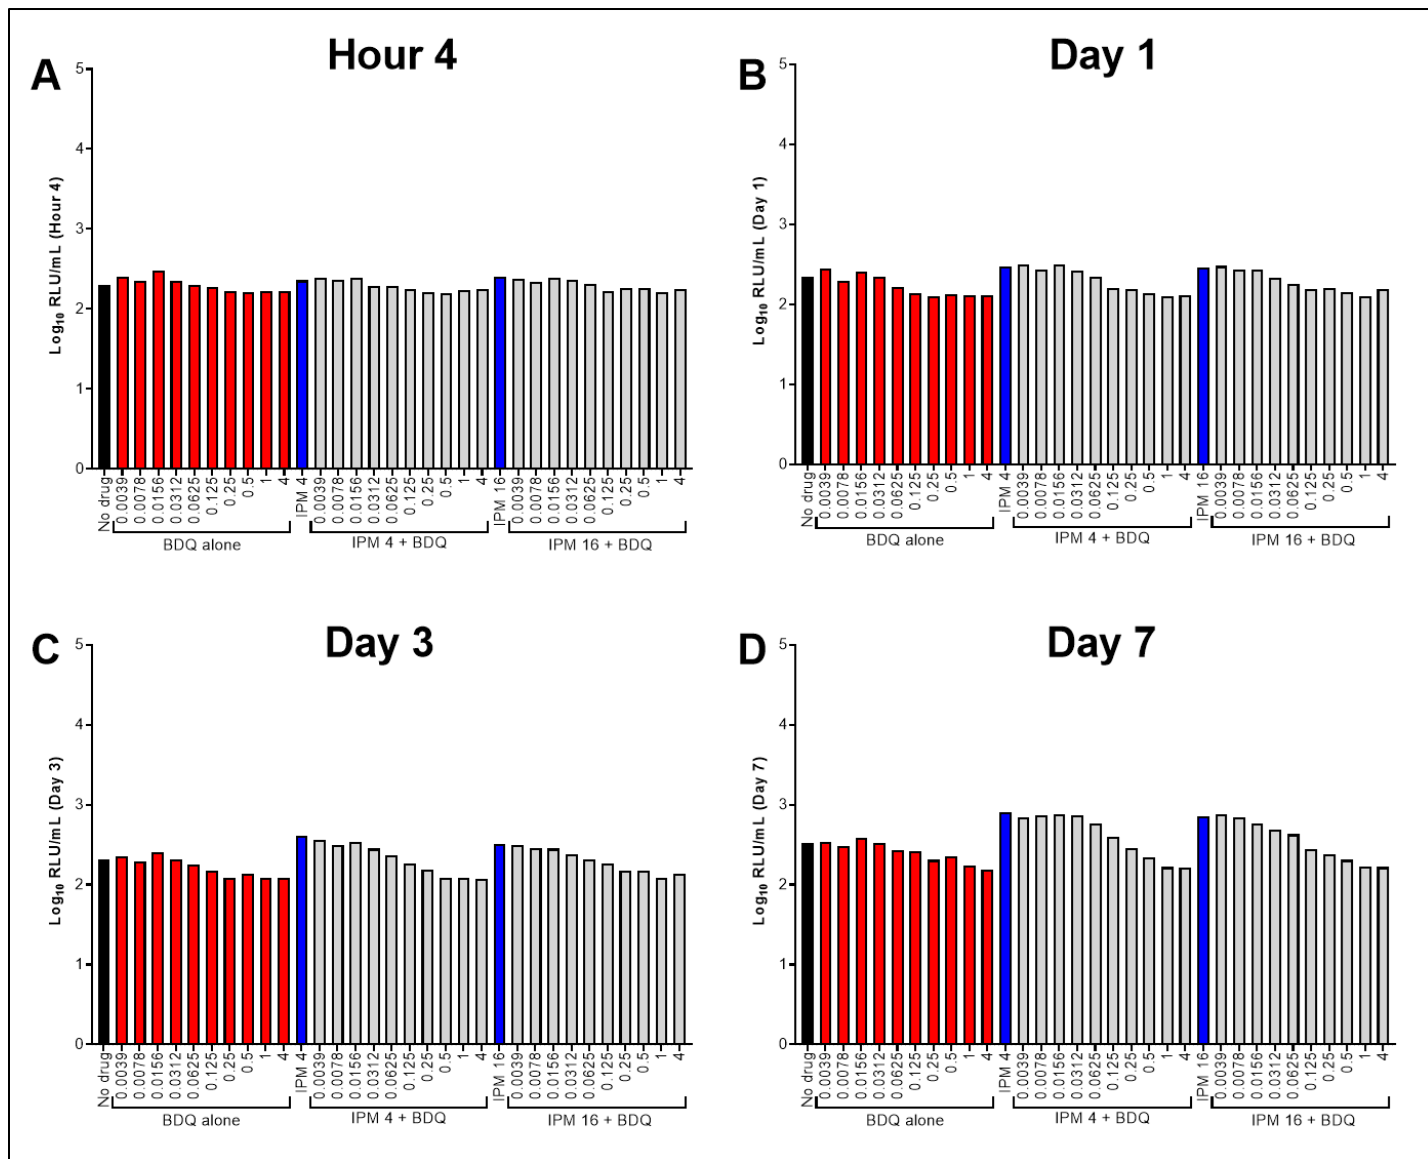

**Fig. S8. Relative ATP levels, not adjusted by CFU counts, associated with exposure of nutrient-starved *M. abscessus* OM7 mutant to bedaquiline (BDQ) and imipenem (IPM) for 4 hours (A), 1 day (B), 3 days (C), or 7 days (D) in PBS without Tween 80.** Bacteria were nutrient-starved in PBS for 14 days prior to drug exposure. ATP levels are indicated by relative fluorescence units (RLU)/CFU from samples. Black bars represent the no drug control; red bars indicate BDQ only samples; blue bars represent IPM only samples, and gray bars indicate IPM plus BDQ samples. The number after each drug abbreviation represents the concentration in  $\mu\text{g/mL}$  (for gray bars the BDQ concentration in  $\mu\text{g/mL}$  is presented under each bar). RLU values are provided in **Table S10**.

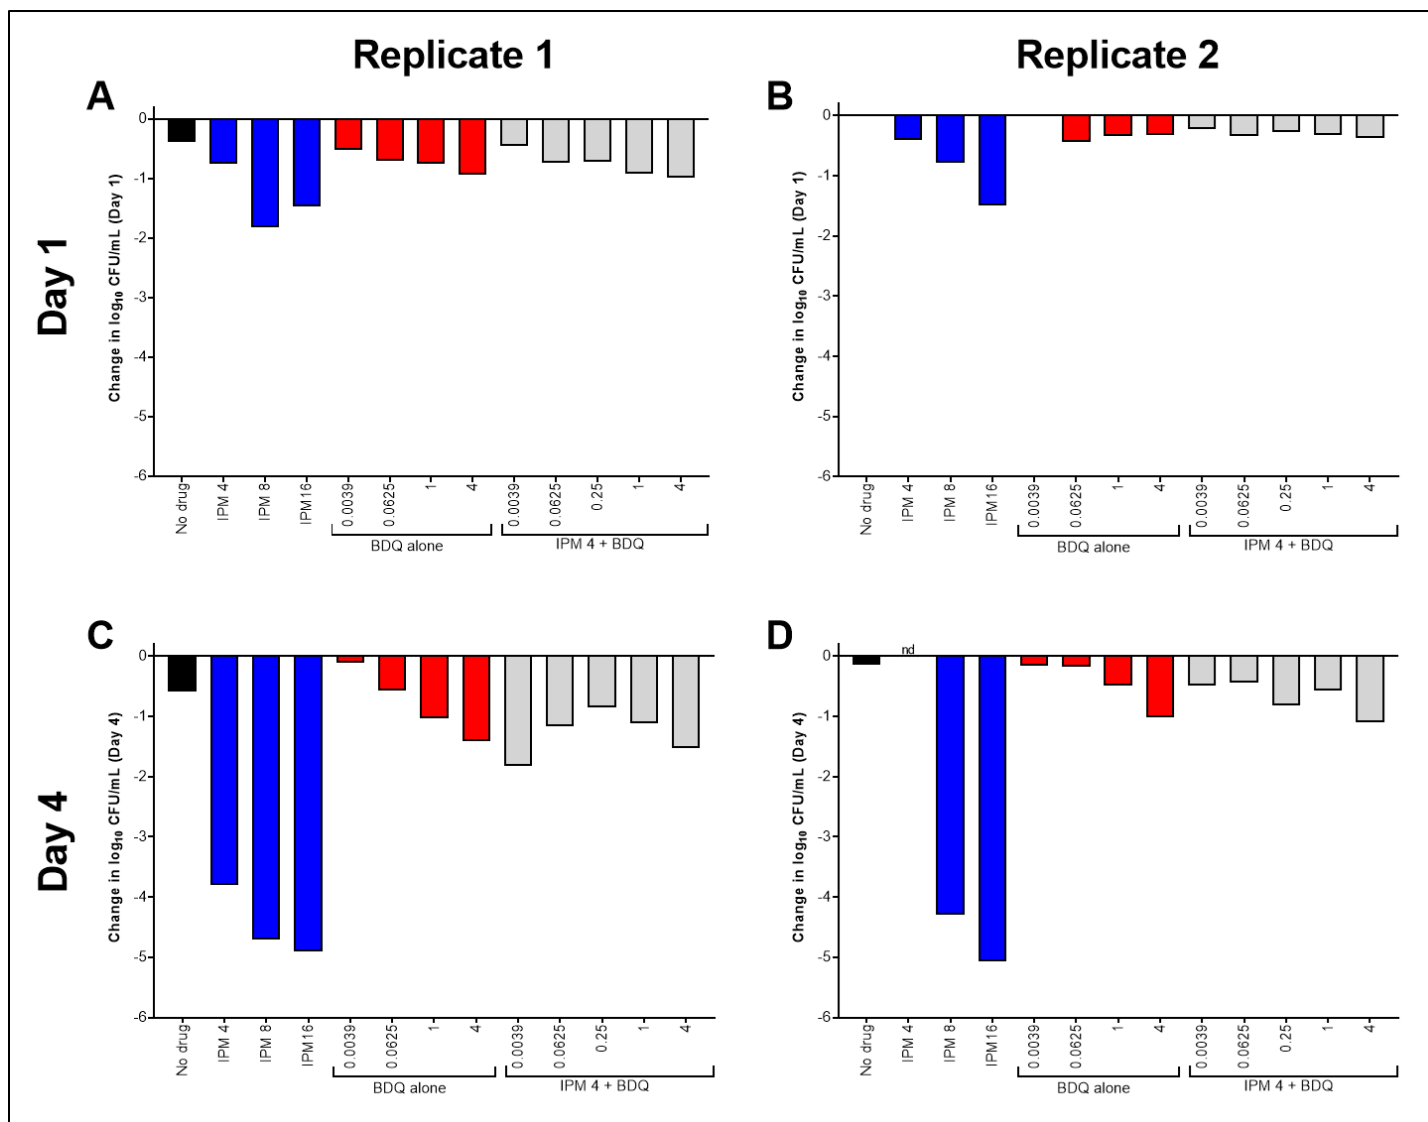

**Fig. S9. Activity of bedaquiline (BDQ) and imipenem (IPM) against nutrient-starved *M. abscessus* ATCC 19977 WT in PBS with 0.05% Tween 80.** Bacteria were nutrient-starved in PBS for 20 days prior to drug exposure. Data are presented for two biological replicates (replicate 1 in panels A and C; and replicate 2 in panels B and D). The changes in log<sub>10</sub> CFU/mL after 1 and 4 days of drug exposure relative to Day 0 are presented in panels A/B and C/D, respectively. Black bars indicate the no drug control; red bars indicate BDQ only samples; blue bars represent IPM only samples, and gray bars indicate IPM + BDQ samples. The number after the IPM abbreviation represents the concentration in µg/mL; for red and gray bars, the BDQ concentration in µg/mL is under each bar. Partial data from replicate 1 after 4 days of drug exposure are presented in **Fig. 8**. The Day 0 bacterial concentration for replicate 1 and 2 was 6.07 and 6.38 log<sub>10</sub> CFU/mL, respectively. CFU values are provided in **Table S11**.

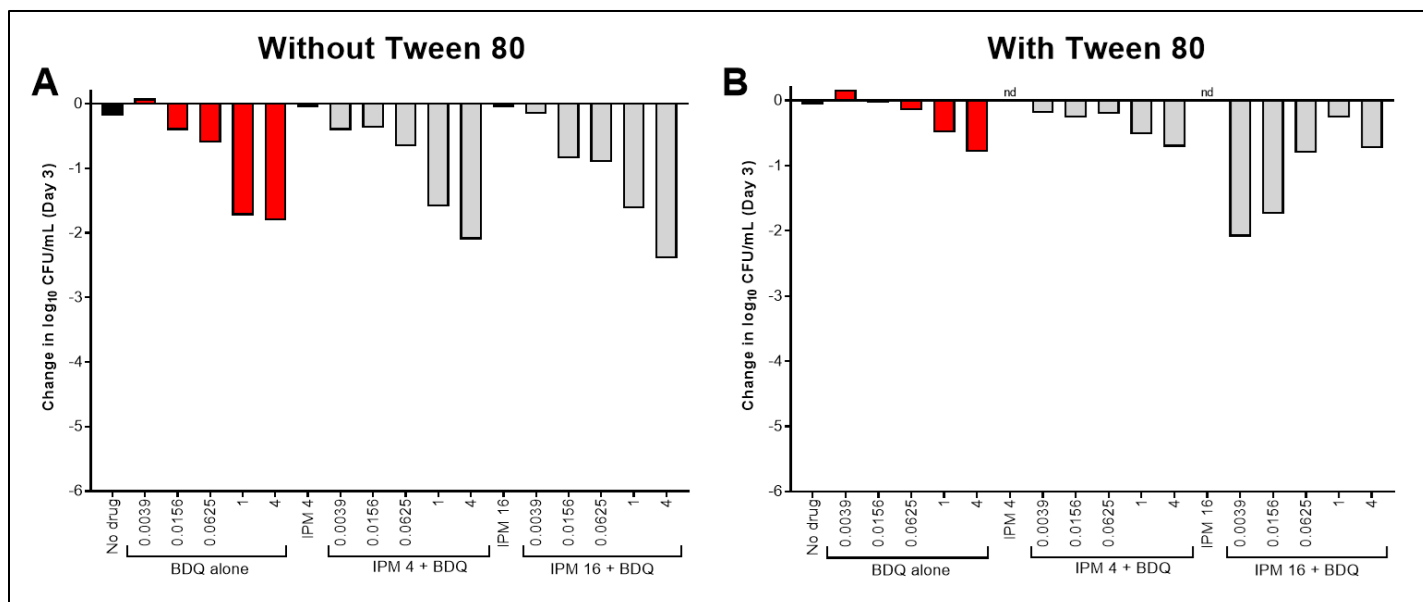

**Fig. S10. Activity of bedaquiline (BDQ) and imipenem (IPM) against nutrient-starved *M. abscessus* ATCC 19977 WT in PBS without Tween 80 (A) and with 0.05% Tween 80 (B).** Bacteria were nutrient-starved in PBS for 20 days prior to drug exposure. Data are presented for two biological replicates (replicate 1 in panels A and C; and replicate 2 in panels B and D). The changes in log<sub>10</sub> CFU/mL after 3 days of drug exposure relative to Day 0 are presented. Black bars indicate the no drug control; red bars indicate BDQ only samples; blue bars represent IPM only samples, and gray bars indicate IPM + BDQ samples. The number after the IPM abbreviation represents the concentration in µg/mL; for red and gray bars, the BDQ concentration in µg/mL is under each bar. The Day 0 bacterial concentration for panel A and B was 6.48 and 6.51 log<sub>10</sub> CFU/mL, respectively. nd, not determined (samples lost). CFU values are provided in **Table S12**.

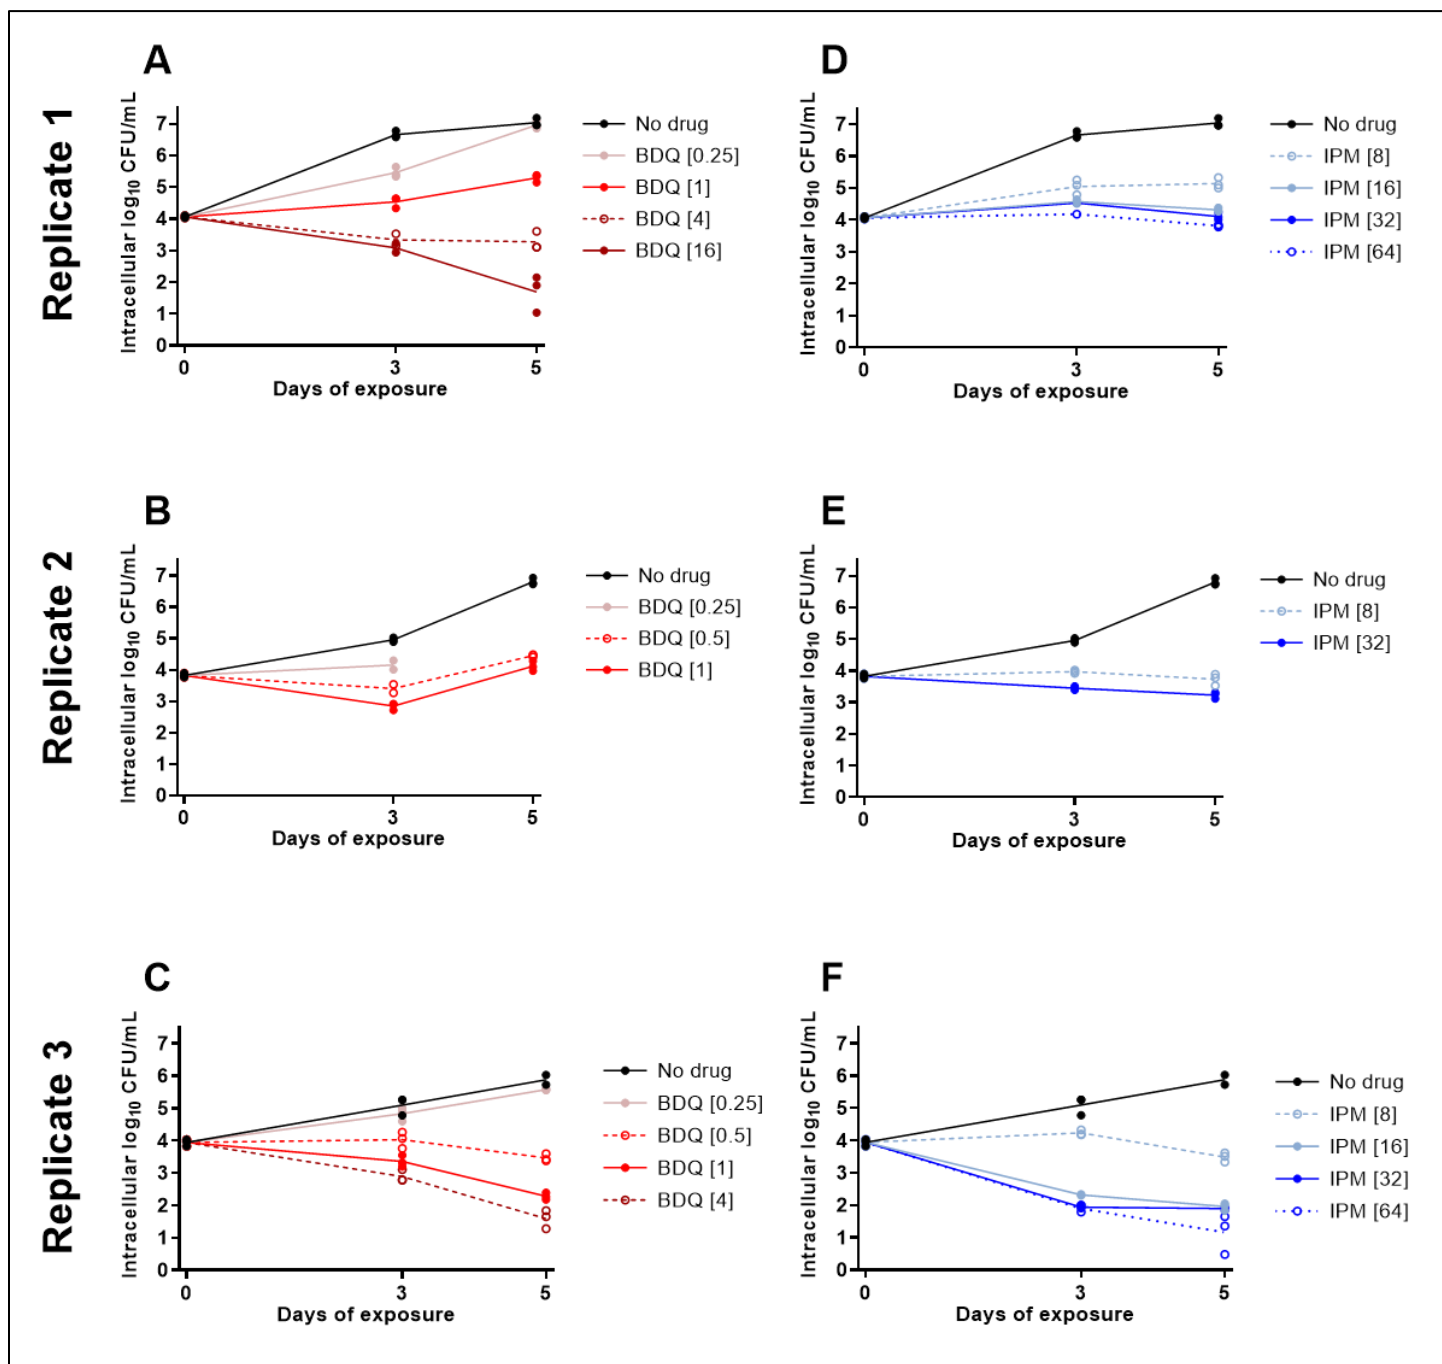

**Fig. S11. Concentration-ranging activity of bedaquiline (BDQ) (A-C) and imipenem (IPM) (D-F) alone against intracellular (THP-1 cells) *M. abscessus* ATCC 19977 WT.** Data are presented for 3 biological replicates: replicate 1, panels A,D; replicate 2, panels B,E; replicate 3, panels C,F. Each data point represents a technical replicate, and the connecting lines pass through the mean values. The [number] after each drug abbreviation represents the concentration in µg/mL. All CFU values are provided in **Table S13**.

**Table S1. Bedaquiline-resistant *M. abscessus* laboratory isolates.**

| <i>M. abscessus</i> isolate | Mor-pho-type | CFZ MIC (µg/ml) |     | BDQ MIC (µg/ml) |     | <i>MAB_2299c</i> mutation | <i>MAB_2299c</i> AA change | <i>MAB_4384</i> mutation |
|-----------------------------|--------------|-----------------|-----|-----------------|-----|---------------------------|----------------------------|--------------------------|
|                             |              | CAMHB           | 7H9 | CAMHB           | 7H9 |                           |                            |                          |
| ATCC 19977<br>WT            | WT           | 0.25            | 8   | 0.0625          | 1   | None                      | None                       | None                     |
| OM1                         | WT           | 4               | 16  | 0.25            | 4   | 19C>T                     | Q7I                        | None                     |
| OM3                         | WT           | 2               | 16  | 0.5             | 4   | 19C>T                     | Q7I                        | None                     |
| OM4                         | Rough        | nd              | 16  | nd              | 4   | 566G>del                  | Frameshift                 | None                     |
| OM7                         | WT           | 2               | 16  | 0.5             | 4   | -18_122del                | N-terminal truncation      | None                     |

WT, wild type. CFZ, clofazimine. BDQ, bedaquiline. MIC: minimum inhibitory concentration, determined by broth microdilution. CAMHB: cation-adjusted Mueller-Hinton broth; 7H9: Middlebrook 7H9 broth with 10% (v/v) Middlebrook oleic acid-albumin-dextrose-catalase supplement; AA, amino acid; nd, not determined. Tween 80 was not included in either assay medium.

**Table S2. CFU data from samples presented in Fig. 1.** This table also includes data from replicate assays that are not shown in Fig. 1. Assay medium was CAMHB with 0.05% Tween 80. Red shading indicates bedaquiline (BDQ) samples, and blue shading indicates imipenem (IPM) or IMP with avibactam (AVI) samples.

| Strain, condition,<br>Day 0 bacterial burden,<br>figure number                                                                           | Drug(s) and<br>concentration(s)<br>in µg/mL | Log <sub>10</sub> CFU/mL at the<br>following time points: |       |
|------------------------------------------------------------------------------------------------------------------------------------------|---------------------------------------------|-----------------------------------------------------------|-------|
|                                                                                                                                          |                                             | Day 3                                                     | Day 7 |
| ATCC 19977 WT,<br>CAMHB + Tween,<br>Day 0 = 5.96 log <sub>10</sub> CFU/mL,<br><b>Fig. 1A</b> (Day 3 data); Day 7<br>data not in a figure | No drug                                     | Clump                                                     | Clump |
|                                                                                                                                          | BDQ 0.015625                                | Clump                                                     | Clump |
|                                                                                                                                          | BDQ 0.03125                                 | Clump                                                     | Clump |
|                                                                                                                                          | BDQ 0.0625                                  | 6.58                                                      | 6.56  |
|                                                                                                                                          | BDQ 0.125                                   | 6.27                                                      | 6.41  |
|                                                                                                                                          | BDQ 0.25                                    | 6.02                                                      | 6.08  |
|                                                                                                                                          | BDQ 0.5                                     | 6.04                                                      | 5.78  |
|                                                                                                                                          | BDQ 1                                       | 5.93                                                      | 5.91  |
|                                                                                                                                          | BDQ 2                                       | 5.95                                                      | 5.30  |
|                                                                                                                                          | BDQ 4                                       | 5.92                                                      | 5.53  |
|                                                                                                                                          | BDQ 8                                       | 6.09                                                      | 5.53  |
|                                                                                                                                          | BDQ 16                                      | 6.03                                                      | 5.30  |
| OM7 mutant,<br>CAMHB + Tween,<br>Day 0 = 6.11 log <sub>10</sub> CFU/mL,<br><b>Fig. 1B</b> (Day 3 data); Day 7<br>data not in a figure    | No drug                                     | Clump                                                     | Clump |
|                                                                                                                                          | BDQ 0.015625                                | Clump                                                     | Clump |
|                                                                                                                                          | BDQ 0.03125                                 | Clump                                                     | Clump |
|                                                                                                                                          | BDQ 0.0625                                  | Clump                                                     | Clump |
|                                                                                                                                          | BDQ 0.125                                   | Clump                                                     | Clump |
|                                                                                                                                          | BDQ 0.25                                    | Clump                                                     | Clump |
|                                                                                                                                          | BDQ 0.5                                     | Clump                                                     | Clump |
|                                                                                                                                          | BDQ 1                                       | Clump                                                     | Clump |
|                                                                                                                                          | BDQ 2                                       | 5.90                                                      | 5.95  |
|                                                                                                                                          | BDQ 4                                       | 6.10                                                      | 6.11  |
|                                                                                                                                          | BDQ 8                                       | 6.15                                                      | 5.72  |
|                                                                                                                                          | BDQ 16                                      | 5.96                                                      | 5.72  |
| ATCC 19977 WT,<br>CAMHB + Tween,<br>Day 0 = 5.81 log <sub>10</sub> CFU/mL,<br><b>Fig. 1C</b>                                             | No drug                                     | Clump                                                     | nd    |
|                                                                                                                                          | IPM 0.5                                     | Clump                                                     | nd    |
|                                                                                                                                          | IPM 1                                       | 6.45                                                      | nd    |
|                                                                                                                                          | IPM 2                                       | 4.62                                                      | nd    |
|                                                                                                                                          | IPM 4                                       | 3.17                                                      | nd    |
|                                                                                                                                          | IPM 8                                       | 3.09                                                      | nd    |
|                                                                                                                                          | IPM 16                                      | 3.02                                                      | nd    |
|                                                                                                                                          | IPM 32                                      | 2.81                                                      | nd    |
|                                                                                                                                          | IPM 64                                      | 2.82                                                      | nd    |
|                                                                                                                                          | IPM 128                                     | 2.86                                                      | nd    |
| ATCC 19977 WT,<br>CAMHB + Tween,<br>Day 0 = 6.20 log <sub>10</sub> CFU/mL,<br>Replicate not in a figure                                  | No drug                                     | Clump                                                     | Clump |
|                                                                                                                                          | IPM 1                                       | 6.64                                                      | Clump |
|                                                                                                                                          | IPM 2                                       | 6.48                                                      | Clump |
|                                                                                                                                          | IPM 4                                       | 6.00                                                      | Clump |
|                                                                                                                                          | IPM 8                                       | 4.90                                                      | Clump |
|                                                                                                                                          | IPM 16                                      | 4.41                                                      | 6.85  |
|                                                                                                                                          | IPM 32                                      | 3.10                                                      | 6.03  |
|                                                                                                                                          | IPM 64                                      | 3.32                                                      | 5.41  |
|                                                                                                                                          | IPM 128                                     | 3.48                                                      | 2.51  |
| IPM 256                                                                                                                                  | 3.87                                        | 1.54                                                      |       |

Table continued on next page.

**Table S2, continued.**

| Strain, condition,<br>Day 0 bacterial burden,<br>figure number                                              | Drug(s) and<br>concentration(s)<br>in µg/mL | Log <sub>10</sub> CFU/mL at the<br>following time points: |       |
|-------------------------------------------------------------------------------------------------------------|---------------------------------------------|-----------------------------------------------------------|-------|
|                                                                                                             |                                             | Day 3                                                     | Day 7 |
| <b>OM7 mutant,</b><br>CAMHB + Tween,<br>Day 0 = 5.85 log <sub>10</sub> CFU/mL,<br><b>Fig. 1D</b>            | No drug                                     | Clump                                                     | nd    |
|                                                                                                             | IPM 0.5                                     | Clump                                                     | nd    |
|                                                                                                             | IPM 1                                       | 6.16                                                      | nd    |
|                                                                                                             | IPM 2                                       | 2.33                                                      | nd    |
|                                                                                                             | IPM 4                                       | 1.23                                                      | nd    |
|                                                                                                             | IPM 8                                       | 1.49                                                      | nd    |
|                                                                                                             | IPM 16                                      | 2.17                                                      | nd    |
|                                                                                                             | IPM 32                                      | 1.11                                                      | nd    |
|                                                                                                             | IPM 64                                      | 0.85                                                      | nd    |
|                                                                                                             | IPM 128                                     | 0*                                                        | nd    |
| <b>OM7 mutant,</b><br>CAMHB + Tween,<br>Day 0 = 5.96 log <sub>10</sub> CFU/mL,<br>Replicate not in a figure | No drug                                     | Clump                                                     | Clump |
|                                                                                                             | IPM 1                                       | 5.60                                                      | Clump |
|                                                                                                             | IPM 2                                       | 3.00                                                      | Clump |
|                                                                                                             | IPM 4                                       | 3.00                                                      | 6.31  |
|                                                                                                             | IPM 8                                       | 2.30                                                      | 2.79  |
|                                                                                                             | IPM 16                                      | 3.58                                                      | 2.42  |
|                                                                                                             | IPM 32                                      | 3.14                                                      | 2.66  |
|                                                                                                             | IPM 64                                      | 3.35                                                      | 2.68  |
|                                                                                                             | IPM 128                                     | 4.15                                                      | 2.75  |
|                                                                                                             | IPM 256                                     | 0.85                                                      | 2.41  |
| <b>ATCC 19977 WT,</b><br>CAMHB + Tween,<br>Day 0 = 5.81 log <sub>10</sub> CFU/mL,<br><b>Fig. 1E</b>         | No drug                                     | Clump                                                     | nd    |
|                                                                                                             | AVI 2                                       | Cump                                                      | nd    |
|                                                                                                             | IPM 0.5 + AVI 2                             | 6.37                                                      | nd    |
|                                                                                                             | IPM 1 + AVI 2                               | 5.45                                                      | nd    |
|                                                                                                             | IPM 2 + AVI 2                               | 2.83                                                      | nd    |
|                                                                                                             | IPM 4 + AVI 2                               | 2.90                                                      | nd    |
|                                                                                                             | IPM 8 + AVI 2                               | 2.81                                                      | nd    |
|                                                                                                             | IPM 16 + AVI 2                              | 2.81                                                      | nd    |
|                                                                                                             | IPM 32 + AVI 2                              | 2.89                                                      | nd    |
|                                                                                                             | IPM 64 + AVI 2                              | 2.72                                                      | nd    |
| IPM 128 + AVI 2                                                                                             | 2.66                                        | nd                                                        |       |
| <b>OM7 mutant,</b><br>CAMHB + Tween,<br>Day 0 = 5.85 log <sub>10</sub> CFU/mL,<br><b>Fig. 1F</b>            | No drug                                     | Clump                                                     | nd    |
|                                                                                                             | AVI 2                                       | Cump                                                      | nd    |
|                                                                                                             | IPM 0.5 + AVI 2                             | 6.22                                                      | nd    |
|                                                                                                             | IPM 1 + AVI 2                               | 5.45                                                      | nd    |
|                                                                                                             | IPM 2 + AVI 2                               | 2.87                                                      | nd    |
|                                                                                                             | IPM 4 + AVI 2                               | 3.72                                                      | nd    |
|                                                                                                             | IPM 8 + AVI 2                               | 3.15                                                      | nd    |
|                                                                                                             | IPM 16 + AVI 2                              | 3.10                                                      | nd    |
|                                                                                                             | IPM 32 + AVI 2                              | 3.04                                                      | nd    |
|                                                                                                             | IPM 64 + AVI 2                              | 3.02                                                      | nd    |
| IPM 128 + AVI 2                                                                                             | 2.78                                        | nd                                                        |       |

"Clump" indicates that the bacteria had overgrown and formed clumps, precluding CFU quantification. nd, not determined.

\*Lower limit of detection: 0.48 log<sub>10</sub> CFU/mL

**Table S3. CFU data from samples presented in Fig. 2.** Assay medium was CAMHB with 0.05% Tween 80. Red shading indicates bedaquiline (BDQ) samples, blue shading indicates imipenem (IPM) or IMP with avibactam (AVI) samples, and gray shading indicates IPM + AVI + BDQ samples.

| Strain, condition,<br>Day 0 bacterial burden,<br>figure number                                                                                                                                           | Drug(s) and<br>concentration(s)<br>in µg/mL | Log <sub>10</sub> CFU/mL at the<br>following time points: |        |
|----------------------------------------------------------------------------------------------------------------------------------------------------------------------------------------------------------|---------------------------------------------|-----------------------------------------------------------|--------|
|                                                                                                                                                                                                          |                                             | Day 3                                                     | Day 5  |
| <b>ATCC 19977 WT</b> ,<br>CAMHB + Tween,<br>Day 0 = 5.57 log <sub>10</sub> CFU/mL,<br><b>Fig. 2A</b> (Day 3 data);<br>Day 5 data and<br>data from additional<br>combinations not included<br>in a figure | No drug                                     | Clump                                                     | Clump  |
|                                                                                                                                                                                                          | BDQ 0.5                                     | 5.45                                                      | Clump  |
|                                                                                                                                                                                                          | BDQ 1                                       | 5.30                                                      | Clump  |
|                                                                                                                                                                                                          | AVI 2                                       | Clump                                                     | Clump  |
|                                                                                                                                                                                                          | IPM 2                                       | Clump                                                     | Clump  |
|                                                                                                                                                                                                          | IPM 4                                       | 5.26                                                      | Clump  |
|                                                                                                                                                                                                          | IPM 2 + AVI 2                               | 3.78                                                      | Clump  |
|                                                                                                                                                                                                          | IPM 4 + AVI 2                               | 3.30                                                      | Clump  |
|                                                                                                                                                                                                          | IPM 2 + AVI 2 + BDQ 0.00390625              | 3.60                                                      | <3.30* |
|                                                                                                                                                                                                          | IPM 2 + AVI 2 + BDQ 0.015625                | 5.14                                                      | 5.56   |
|                                                                                                                                                                                                          | IPM 2 + AVI 2 + BDQ 0.0625                  | 5.26                                                      | 5.03   |
|                                                                                                                                                                                                          | IPM 2 + AVI 2 + BDQ 0.25                    | 5.82                                                      | 5.45   |
|                                                                                                                                                                                                          | IPM 2 + AVI 2 + BDQ 0.5                     | 5.88                                                      | 5.73   |
|                                                                                                                                                                                                          | IPM 2 + AVI 2 + BDQ 1                       | 5.99                                                      | 5.81   |
|                                                                                                                                                                                                          | IPM 4 + AVI 2 + BDQ 0.00390625              | 3.26                                                      | Clump  |
|                                                                                                                                                                                                          | IPM 4 + AVI 2 + BDQ 0.015625                | 4.13                                                      | Clump  |
|                                                                                                                                                                                                          | IPM 4 + AVI 2 + BDQ 0.0625                  | 5.26                                                      | Clump  |
|                                                                                                                                                                                                          | IPM 4 + AVI 2 + BDQ 0.25                    | 5.66                                                      | Clump  |
|                                                                                                                                                                                                          | IPM 4 + AVI 2 + BDQ 0.5                     | 5.72                                                      | Clump  |
|                                                                                                                                                                                                          | IPM 4 + AVI 2 + BDQ 1                       | 5.81                                                      | Clump  |
| <b>OM7 mutant</b> ,<br>CAMHB + Tween,<br>Day 0 = 5.76 log <sub>10</sub> CFU/mL,<br><b>Fig. 2B</b> (Day 3 data);<br>Day 5 data and<br>data from additional<br>combinations not included<br>in a figure    | No drug                                     | Clump                                                     | Clump  |
|                                                                                                                                                                                                          | BDQ 0.5                                     | 7.06                                                      | Clump  |
|                                                                                                                                                                                                          | BDQ 1                                       | 6.12                                                      | Clump  |
|                                                                                                                                                                                                          | AVI 2                                       | Clump                                                     | Clump  |
|                                                                                                                                                                                                          | IPM 2                                       | 6.18                                                      | Clump  |
|                                                                                                                                                                                                          | IPM 4                                       | 5.08                                                      | Clump  |
|                                                                                                                                                                                                          | IPM 2 + AVI 2                               | 3.60                                                      | Clump  |
|                                                                                                                                                                                                          | IPM 4 + AVI 2                               | 4.00                                                      | Clump  |
|                                                                                                                                                                                                          | IPM 2 + AVI 2 + BDQ 0.00390625              | 2.78                                                      | 5.58   |
|                                                                                                                                                                                                          | IPM 2 + AVI 2 + BDQ 0.015625                | 3.20                                                      | 5.56   |
|                                                                                                                                                                                                          | IPM 2 + AVI 2 + BDQ 0.0625                  | 4.89                                                      | Clump  |
|                                                                                                                                                                                                          | IPM 2 + AVI 2 + BDQ 0.25                    | 5.45                                                      | Clump  |
|                                                                                                                                                                                                          | IPM 2 + AVI 2 + BDQ 0.5                     | 5.90                                                      | Clump  |
|                                                                                                                                                                                                          | IPM 2 + AVI 2 + BDQ 1                       | 5.75                                                      | Clump  |
|                                                                                                                                                                                                          | IPM 4 + AVI 2 + BDQ 0.00390625              | 4.87                                                      | 4.82   |
|                                                                                                                                                                                                          | IPM 4 + AVI 2 + BDQ 0.015625                | 2.78                                                      | 4.99   |
|                                                                                                                                                                                                          | IPM 4 + AVI 2 + BDQ 0.0625                  | 4.25                                                      | 6.24   |
|                                                                                                                                                                                                          | IPM 4 + AVI 2 + BDQ 0.25                    | 5.30                                                      | Clump  |
|                                                                                                                                                                                                          | IPM 4 + AVI 2 + BDQ 0.5                     | 5.15                                                      | 5.64   |
|                                                                                                                                                                                                          | IPM 4 + AVI 2 + BDQ 1                       | 5.48                                                      | 6.66   |

"Clump" indicates that the bacteria had overgrown and formed clumps, precluding CFU quantification.

\*The lower limit of detection for this sample was 3.30 log<sub>10</sub> CFU/mL.



**Table S4. CFU data from samples presented in Fig. S2.** Assay medium was CAMHB with 0.05% Tween 80. Gray shading indicates imipenem (IPM) + avibactam (AVI) + bedaquiline (BDQ) samples.

| Strain, condition,<br>Day 0 bacterial burden,<br>figure number                                                                                               | Drug(s) and<br>concentration(s)<br>in µg/mL | Log <sub>10</sub> CFU/mL at the<br>following time points: |       |
|--------------------------------------------------------------------------------------------------------------------------------------------------------------|---------------------------------------------|-----------------------------------------------------------|-------|
|                                                                                                                                                              |                                             | Day 3                                                     | Day 5 |
| <b>ATCC 19977 WT,</b><br>CAMHB + Tween,<br>Day 0 = 6.13 log <sub>10</sub> CFU/mL,<br><b>Fig. S2A</b> (Day 3 data);<br>Day 5 data not included<br>in a figure | No drug                                     | Clump                                                     | Clump |
|                                                                                                                                                              | IPM 2 + AVI 2 + BDQ 0.00390625              | 5.20                                                      | 7.15  |
|                                                                                                                                                              | IPM 2 + AVI 2 + BDQ 0.0078125               | 5.03                                                      | 6.45  |
|                                                                                                                                                              | IPM 2 + AVI 2 + BDQ 0.015625                | 4.34                                                      | 6.79  |
|                                                                                                                                                              | IPM 2 + AVI 2 + BDQ 0.03125                 | 5.70                                                      | 6.56  |
|                                                                                                                                                              | IPM 2 + AVI 2 + BDQ 0.0625                  | 5.79                                                      | 6.30  |
|                                                                                                                                                              | IPM 2 + AVI 2 + BDQ 0.125                   | 6.01                                                      | 6.20  |
|                                                                                                                                                              | IPM 2 + AVI 2 + BDQ 0.25                    | 5.89                                                      | 6.58  |
|                                                                                                                                                              | IPM 2 + AVI 2 + BDQ 0.5                     | 5.87                                                      | 5.76  |
|                                                                                                                                                              | IPM 2 + AVI 2 + BDQ 1                       | 5.81                                                      | 6.34  |
|                                                                                                                                                              | IPM 4 + AVI 2 + BDQ 0.00390625              | 5.16                                                      | 7.20  |
|                                                                                                                                                              | IPM 4 + AVI 2 + BDQ 0.0078125               | <3.30*                                                    | 5.82  |
|                                                                                                                                                              | IPM 4 + AVI 2 + BDQ 0.015625                | 5.11                                                      | 6.51  |
|                                                                                                                                                              | IPM 4 + AVI 2 + BDQ 0.03125                 | 5.23                                                      | 6.45  |
|                                                                                                                                                              | IPM 4 + AVI 2 + BDQ 0.0625                  | 5.62                                                      | 6.29  |
|                                                                                                                                                              | IPM 4 + AVI 2 + BDQ 0.125                   | 5.79                                                      | 6.87  |
|                                                                                                                                                              | IPM 4 + AVI 2 + BDQ 0.25                    | 5.86                                                      | 5.82  |
|                                                                                                                                                              | IPM 4 + AVI 2 + BDQ 0.5                     | 5.81                                                      | 5.87  |
|                                                                                                                                                              | IPM 4 + AVI 2 + BDQ 1                       | 5.89                                                      | 5.97  |
| <b>OM7 mutant,</b><br>CAMHB + Tween,<br>Day 0 = 6.22 log <sub>10</sub> CFU/mL,<br><b>Fig. S2B</b> (Day 3 data);<br>Day 5 data not included<br>in a figure    | No drug                                     | Clump                                                     | Clump |
|                                                                                                                                                              | IPM 2 + AVI 2 + BDQ 0.00390625              | 4.60                                                      | 6.72  |
|                                                                                                                                                              | IPM 2 + AVI 2 + BDQ 0.0078125               | 4.48                                                      | 6.56  |
|                                                                                                                                                              | IPM 2 + AVI 2 + BDQ 0.015625                | 4.76                                                      | 6.56  |
|                                                                                                                                                              | IPM 2 + AVI 2 + BDQ 0.03125                 | 4.70                                                      | 6.64  |
|                                                                                                                                                              | IPM 2 + AVI 2 + BDQ 0.0625                  | 4.97                                                      | 6.53  |
|                                                                                                                                                              | IPM 2 + AVI 2 + BDQ 0.125                   | 5.51                                                      | 6.70  |
|                                                                                                                                                              | IPM 2 + AVI 2 + BDQ 0.25                    | 5.64                                                      | 5.94  |
|                                                                                                                                                              | IPM 2 + AVI 2 + BDQ 0.5                     | 5.76                                                      | 6.15  |
|                                                                                                                                                              | IPM 2 + AVI 2 + BDQ 1                       | 5.89                                                      | 5.72  |
|                                                                                                                                                              | IPM 4 + AVI 2 + BDQ 0.00390625              | 3.38                                                      | 6.70  |
|                                                                                                                                                              | IPM 4 + AVI 2 + BDQ 0.0078125               | 3.15                                                      | 5.30  |
|                                                                                                                                                              | IPM 4 + AVI 2 + BDQ 0.015625                | 3.00                                                      | 5.09  |
|                                                                                                                                                              | IPM 4 + AVI 2 + BDQ 0.03125                 | 3.70                                                      | 6.19  |
|                                                                                                                                                              | IPM 4 + AVI 2 + BDQ 0.0625                  | 4.41                                                      | 5.03  |
|                                                                                                                                                              | IPM 4 + AVI 2 + BDQ 0.125                   | 5.18                                                      | 5.27  |
|                                                                                                                                                              | IPM 4 + AVI 2 + BDQ 0.25                    | 5.48                                                      | 5.96  |
|                                                                                                                                                              | IPM 4 + AVI 2 + BDQ 0.5                     | 5.53                                                      | 6.45  |
|                                                                                                                                                              | IPM 4 + AVI 2 + BDQ 1                       | 5.72                                                      | 5.57  |

"Clump" indicates that the bacteria had overgrown and formed clumps, precluding CFU quantification.

\*The lower limit of detection for this sample was 3.30 log<sub>10</sub> CFU/mL. The value of 3.30 log<sub>10</sub> CFU/mL was used to calculate the change in CFU from Day 0, presented in Fig. S2.

**Table S5. CFU data from samples presented in Fig. 3.** Assay medium was CAMHB with 0.05% Tween 80. Red shading indicates bedaquiline (BDQ) samples; blue shading indicates meropenem (MEM), MmpL3 inhibitor (MPL), or clarithromycin (CLR) samples; and gray shading indicates BDQ combination samples. MPL is N-4S-methylcyclohexyl-4,6-dimethyl-1H-indole-2-carboxamide.

| Strain, condition,<br>Day 0 bacterial burden,<br>figure number                       | Drug(s)/compound(s) and<br>concentration(s)<br>in µg/mL | Log <sub>10</sub> CFU/mL at the following time points: |       |       |
|--------------------------------------------------------------------------------------|---------------------------------------------------------|--------------------------------------------------------|-------|-------|
|                                                                                      |                                                         | Day 3                                                  | Day 5 | Day 8 |
| ATCC 19977 WT,<br>CAMHB + Tween,<br>Day 0 = 6.40 log <sub>10</sub> CFU/mL,<br>Fig. 3 | No drug                                                 | 7.59                                                   | Clump | Clump |
|                                                                                      | BDQ 0.00390625                                          | 6.77                                                   | 7.20  | 6.43  |
|                                                                                      | BDQ 0.015625                                            | 7.15                                                   | 7.67  | 6.59  |
|                                                                                      | BDQ 0.125                                               | 6.41                                                   | 6.48  | 5.40  |
|                                                                                      | BDQ 1                                                   | 5.34                                                   | 5.36  | 5.04  |
|                                                                                      | BDQ 4                                                   | 5.20                                                   | 5.26  | 4.85  |
|                                                                                      | MEM 16                                                  | 3.23                                                   | 2.48  | 2.73  |
|                                                                                      | MEM 16 + BDQ 0.00390625                                 | 3.98                                                   | 2.66  | 4.78  |
|                                                                                      | MEM 16 + BDQ 0.015625                                   | 3.76                                                   | 2.32  | 4.85  |
|                                                                                      | MEM 16 + BDQ 0.125                                      | 5.34                                                   | 4.95  | 4.20  |
|                                                                                      | MEM 16 + BDQ 1                                          | 3.76                                                   | 5.15  | 4.85  |
|                                                                                      | MEM 16 + BDQ 4                                          | 5.20                                                   | 5.00  | 4.78  |
|                                                                                      | MPL 2                                                   | 4.11                                                   | 2.30  | 1.04  |
|                                                                                      | MPL 2 + BDQ 0.00390625                                  | 5.26                                                   | 2.85  | 2.38  |
|                                                                                      | MPL 2 + BDQ 0.015625                                    | 6.34                                                   | 5.70  | 6.48  |
|                                                                                      | MPL 2 + BDQ 0.125                                       | 6.15                                                   | 6.56  | 6.53  |
|                                                                                      | MPL 2 + BDQ 1                                           | 5.40                                                   | 5.34  | 5.39  |
|                                                                                      | MPL 2 + BDQ 4                                           | 5.43                                                   | 5.26  | 5.05  |
|                                                                                      | CLR 4                                                   | 4.78                                                   | 3.52  | 3.27  |
|                                                                                      | CLR 4 + BDQ 0.015625                                    | 4.65                                                   | 3.51  | 3.20  |
|                                                                                      | CLR 4 + BDQ 0.125                                       | 4.90                                                   | 3.43  | 2.23  |
|                                                                                      | CLR 4 + BDQ 1                                           | 4.91                                                   | 3.45  | 1.61  |
|                                                                                      | CLR 4 + BDQ 4                                           | 4.79                                                   | 3.40  | 1.32  |

“Clump” indicates that the bacteria had overgrown and formed clumps, precluding CFU quantification.

**Table S6. CFU and relative light unit (RLU) data from samples presented in Fig. 4 and Fig. S3.** Assay medium was CAMHB with 0.05% Tween 80. Red shading indicates bedaquiline (BDQ) samples, blue shading indicates imipenem (IPM) samples, and gray shading indicates IPM + BDQ samples.

| Strain, condition, Day 0 bacterial burden, figure number                                                                           | Drug(s) and concentration(s) in µg/mL | Log <sub>10</sub> CFU/mL at the following time points: |       | Log <sub>10</sub> RLU/mL at the following time points: |       | MegaRLU/CFU at the following time points: |        |
|------------------------------------------------------------------------------------------------------------------------------------|---------------------------------------|--------------------------------------------------------|-------|--------------------------------------------------------|-------|-------------------------------------------|--------|
|                                                                                                                                    |                                       | Day 1                                                  | Day 3 | Day 1                                                  | Day 3 | Day 1                                     | Day 3  |
| <b>ATCC 19977 WT,</b><br>CAMHB + Tween,<br>Day 0 = 6.25 log <sub>10</sub> CFU/mL,<br><b>Fig. 4A,C; Fig. S3A,C</b><br>(Replicate 1) | No drug                               | 6.73                                                   | 7.31  | 3.28                                                   | 3.67  | 356                                       | 228    |
|                                                                                                                                    | BDQ 0.0625                            | 6.72                                                   | 7.24  | 3.27                                                   | 3.58  | 355                                       | 217    |
|                                                                                                                                    | BDQ 1                                 | 6.68                                                   | 6.70  | 2.95                                                   | 3.17  | 185                                       | 296    |
|                                                                                                                                    | IPM 4                                 | 6.12                                                   | 5.66  | 3.78                                                   | 3.61  | 4576                                      | 8945   |
|                                                                                                                                    | IPM 16                                | 4.34                                                   | 4.51  | 3.32                                                   | 3.32  | 95273                                     | 64547  |
|                                                                                                                                    | IPM 4 + BDQ 0.00390625                | 6.06                                                   | 5.16  | 3.84                                                   | 3.60  | 5966                                      | 27435  |
|                                                                                                                                    | IPM 4 + BDQ 0.0078125                 | 6.32                                                   | 4.53  | 3.88                                                   | 3.63  | 3648                                      | 124618 |
|                                                                                                                                    | IPM 4 + BDQ 0.0625                    | 6.62                                                   | 6.51  | 3.74                                                   | 3.77  | 1311                                      | 1830   |
|                                                                                                                                    | IPM 4 + BDQ 0.25                      | 6.58                                                   | 6.58  | 3.24                                                   | 3.57  | 461                                       | 971    |
|                                                                                                                                    | IPM 4 + BDQ 1                         | 6.78                                                   | 6.70  | 2.97                                                   | 3.24  | 156                                       | 351    |
|                                                                                                                                    | IPM 4 + BDQ 4                         | 6.76                                                   | 6.75  | 3.13                                                   | 3.25  | 231                                       | 319    |
|                                                                                                                                    | IPM 16 + BDQ 0.00390625               | 4.56                                                   | 3.48  | 3.33                                                   | 3.33  | 59389                                     | 712667 |
|                                                                                                                                    | IPM 16 + BDQ 0.0625                   | 6.11                                                   | 5.78  | 3.41                                                   | 3.41  | 2026                                      | 4322   |
|                                                                                                                                    | IPM 16 + BDQ 0.25                     | 6.66                                                   | 6.34  | 3.51                                                   | 3.51  | 697                                       | 1457   |
|                                                                                                                                    | IPM 16 + BDQ 1                        | 6.62                                                   | 6.53  | 3.25                                                   | 3.25  | 421                                       | 520    |
| <b>ATCC 19977 WT,</b><br>CAMHB + Tween,<br>Day 0 = 7.03 log <sub>10</sub> CFU/mL,<br><b>Fig. 4B,D; Fig. S3B,D</b><br>(Replicate 2) | No drug                               | 7.06                                                   | 7.42  | 3.44                                                   | 3.60  | 242                                       | 152    |
|                                                                                                                                    | BDQ 0.0625                            | 6.79                                                   | 7.23  | 3.23                                                   | 3.44  | 273                                       | 162    |
|                                                                                                                                    | BDQ 1                                 | 7.09                                                   | 7.01  | 2.52                                                   | 2.82  | 27                                        | 65     |
|                                                                                                                                    | IPM 4                                 | 6.40                                                   | 5.38  | 3.69                                                   | 3.44  | 1910                                      | 11632  |
|                                                                                                                                    | IPM 16                                | 6.21                                                   | 3.87  | 3.28                                                   | 2.97  | 1169                                      | 125338 |
|                                                                                                                                    | IPM 4 + BDQ 0.00390625                | 6.60                                                   | 4.83  | 3.67                                                   | 3.34  | 1170                                      | 32228  |
|                                                                                                                                    | IPM 4 + BDQ 0.0078125                 | 6.26                                                   | 5.61  | 3.64                                                   | 3.45  | 2433                                      | 6934   |
|                                                                                                                                    | IPM 4 + BDQ 0.0625                    | 6.89                                                   | 6.79  | 3.58                                                   | 3.54  | 485                                       | 556    |
|                                                                                                                                    | IPM 4 + BDQ 0.25                      | 6.89                                                   | 6.89  | 3.26                                                   | 3.27  | 236                                       | 241    |
|                                                                                                                                    | IPM 4 + BDQ 1                         | 7.02                                                   | 6.91  | 2.66                                                   | 2.90  | 44                                        | 96     |
|                                                                                                                                    | IPM 4 + BDQ 4                         | 6.86                                                   | 6.86  | 2.53                                                   | 2.79  | 47                                        | 85     |
|                                                                                                                                    | IPM 16 + BDQ 0.00390625               | 6.26                                                   | 4.00  | 3.32                                                   | 3.00  | 1125                                      | 100050 |
|                                                                                                                                    | IPM 16 + BDQ 0.0625                   | 6.82                                                   | 6.45  | 3.30                                                   | 3.25  | 304                                       | 630    |
|                                                                                                                                    | IPM 16 + BDQ 0.25                     | 6.97                                                   | 6.87  | 3.06                                                   | 3.18  | 124                                       | 205    |
|                                                                                                                                    | IPM 16 + BDQ 1                        | 7.00                                                   | 6.83  | 2.73                                                   | 2.95  | 54                                        | 131    |
| IPM 16 + BDQ 4                                                                                                                     | 6.92                                  | 6.91                                                   | 2.59  | 2.87                                                   | 46    | 91                                        |        |

**Table S7. CFU data from samples presented in Fig. 5.** This table also includes data from replicate assays that are not shown in Fig. 5. Assay medium was CAMHB without Tween 80. Red shading indicates bedaquiline (BDQ) samples, and blue shading indicates imipenem (IPM) samples.

| Strain, condition, Day 0 bacterial burden, figure number                                                                          | Drug(s) and concentration(s) in µg/mL | Log <sub>10</sub> CFU/mL at Day 3 |
|-----------------------------------------------------------------------------------------------------------------------------------|---------------------------------------|-----------------------------------|
| ATCC 19977 WT, CAMHB (no Tween), Day 0 = 5.90 log <sub>10</sub> CFU/mL, Fig. 5A, with additional concentrations not in the figure | No drug                               | Clump                             |
|                                                                                                                                   | BDQ 0.0078125                         | Clump                             |
|                                                                                                                                   | BDQ 0.015625                          | 6.44                              |
|                                                                                                                                   | BDQ 0.03125                           | 5.83                              |
|                                                                                                                                   | BDQ 0.0625                            | 5.53                              |
|                                                                                                                                   | BDQ 0.125                             | 5.23                              |
|                                                                                                                                   | BDQ 0.25                              | 5.25                              |
|                                                                                                                                   | BDQ 0.5                               | 5.11                              |
|                                                                                                                                   | BDQ 1                                 | 5.05                              |
|                                                                                                                                   | BDQ 2                                 | 5.00                              |
|                                                                                                                                   | BDQ 4                                 | 5.08                              |
|                                                                                                                                   | BDQ 8                                 | 5.29                              |
|                                                                                                                                   | BDQ 16                                | 5.23                              |
| OM7 mutant, CAMHB (no Tween), Day 0 = 5.08 log <sub>10</sub> CFU/mL, Fig. 5B, with additional concentrations not in the figure    | No drug                               | Clump                             |
|                                                                                                                                   | BDQ 0.0078125                         | Clump                             |
|                                                                                                                                   | BDQ 0.015625                          | Clump                             |
|                                                                                                                                   | BDQ 0.03125                           | Clump                             |
|                                                                                                                                   | BDQ 0.0625                            | Clump                             |
|                                                                                                                                   | BDQ 0.125                             | Clump                             |
|                                                                                                                                   | BDQ 0.25                              | Clump                             |
|                                                                                                                                   | BDQ 0.5                               | 5.70                              |
|                                                                                                                                   | BDQ 1                                 | 5.66                              |
|                                                                                                                                   | BDQ 2                                 | 5.66                              |
|                                                                                                                                   | BDQ 4                                 | 5.79                              |
|                                                                                                                                   | BDQ 8                                 | 5.85                              |
|                                                                                                                                   | BDQ 16                                | 5.95                              |
| ATCC 19977 WT, CAMHB (no Tween), Day 0 = 5.91 log <sub>10</sub> CFU/mL, Fig. 5C                                                   | No drug                               | Clump                             |
|                                                                                                                                   | IPM 1                                 | Clump                             |
|                                                                                                                                   | IPM 2                                 | Clump                             |
|                                                                                                                                   | IPM 4                                 | Clump                             |
|                                                                                                                                   | IPM 8                                 | Clump                             |
|                                                                                                                                   | IPM 16                                | 6.01                              |
|                                                                                                                                   | IPM 32                                | 5.79                              |
|                                                                                                                                   | IPM 64                                | 5.62                              |
|                                                                                                                                   | IPM 128                               | 5.15                              |
|                                                                                                                                   | IPM 256                               | 4.73                              |
| ATCC 19977 WT, CAMHB (no Tween), Day 0 = 5.28 log <sub>10</sub> CFU/mL, Replicate not in a figure                                 | No drug                               | Clump                             |
|                                                                                                                                   | IPM 1                                 | Clump                             |
|                                                                                                                                   | IPM 2                                 | Clump                             |
|                                                                                                                                   | IPM 4                                 | Clump                             |
|                                                                                                                                   | IPM 8                                 | Clump                             |
|                                                                                                                                   | IPM 16                                | 6.06                              |
|                                                                                                                                   | IPM 32                                | 6.12                              |
|                                                                                                                                   | IPM 64                                | 5.00                              |
|                                                                                                                                   | IPM 128                               | 4.78                              |
| IPM 256                                                                                                                           | 4.33                                  |                                   |

Table continued on next page.

**Table S7, continued.**

| Strain, condition,<br>Day 0 bacterial burden,<br>figure number                                                 | Drug(s) and<br>concentration(s)<br>in µg/mL | Log <sub>10</sub> CFU/mL<br>at Day 3 |
|----------------------------------------------------------------------------------------------------------------|---------------------------------------------|--------------------------------------|
| <b>OM7 mutant,</b><br>CAMHB (no Tween),<br>Day 0 = 6.20 log <sub>10</sub> CFU/mL,<br><b>Fig. 5D</b>            | No drug                                     | Clump                                |
|                                                                                                                | IPM 1                                       | 6.58                                 |
|                                                                                                                | IPM 2                                       | 6.64                                 |
|                                                                                                                | IPM 4                                       | 5.91                                 |
|                                                                                                                | IPM 8                                       | 5.38                                 |
|                                                                                                                | IPM 16                                      | 5.41                                 |
|                                                                                                                | IPM 32                                      | 5.45                                 |
|                                                                                                                | IPM 64                                      | 5.00                                 |
|                                                                                                                | IPM 128                                     | 4.86                                 |
|                                                                                                                | IPM 256                                     | 4.62                                 |
| <b>OM7 mutant,</b><br>CAMHB (no Tween),<br>Day 0 = 5.72 log <sub>10</sub> CFU/mL,<br>Replicate not in a figure | No drug                                     | Clump                                |
|                                                                                                                | IPM 1                                       | 5.66                                 |
|                                                                                                                | IPM 2                                       | 5.22                                 |
|                                                                                                                | IPM 4                                       | 5.13                                 |
|                                                                                                                | IPM 8                                       | 5.05                                 |
|                                                                                                                | IPM 16                                      | 5.21                                 |
|                                                                                                                | IPM 32                                      | 3.94                                 |
|                                                                                                                | IPM 64                                      | 4.97                                 |
|                                                                                                                | IPM 128                                     | 4.51                                 |
|                                                                                                                | IPM 256                                     | 4.40                                 |

“Clump” indicates that the bacteria had overgrown and formed clumps, precluding CFU quantification.

**Table S8. CFU and relative light unit (RLU) data from samples presented in Fig. 6 and Fig. S5.** Assay medium was CAMHB without Tween 80. Red shading indicates bedaquiline (BDQ) samples, blue shading indicates imipenem (IPM) samples, and gray shading indicates IPM + BDQ samples.

| Strain, condition,<br>Day 0 bacterial burden,<br>figure number                                                          | Drug(s) and<br>concentration(s)<br>in µg/mL | Log <sub>10</sub> CFU/mL<br>at Day 3 | Log <sub>10</sub> RLU/mL at the<br>following time points: |       | MegaRLU/CFU<br>at Day 3 |
|-------------------------------------------------------------------------------------------------------------------------|---------------------------------------------|--------------------------------------|-----------------------------------------------------------|-------|-------------------------|
|                                                                                                                         |                                             |                                      | Day 1                                                     | Day 3 |                         |
| ATCC 19977 WT,<br>CAMHB (no Tween),<br>Day 0 = 5.62 log <sub>10</sub> CFU/mL,<br>Fig. 6A,C; Fig. S5A,C<br>(replicate 1) | No drug                                     | Clump                                | 3.00                                                      | 4.04  | nd                      |
|                                                                                                                         | IPM 4                                       | 4.51                                 | 3.51                                                      | 3.85  | 100211                  |
|                                                                                                                         | IPM 16                                      | 4.81                                 | 3.43                                                      | 3.45  | 42488                   |
|                                                                                                                         | BDQ 0.00390625                              | Clump                                | 3.20                                                      | 4.20  | nd                      |
|                                                                                                                         | BDQ 0.0078125                               | Clump                                | 2.63                                                      | 4.03  | nd                      |
|                                                                                                                         | BDQ 0.015625                                | 6.16                                 | 2.69                                                      | 3.62  | 339                     |
|                                                                                                                         | BDQ 0.03125                                 | 5.12                                 | 2.32                                                      | 2.83  | 1569                    |
|                                                                                                                         | BDQ 0.0625                                  | 5.09                                 | 2.13                                                      | 2.10  | 1092                    |
|                                                                                                                         | BDQ 0.125                                   | 5.07                                 | 2.25                                                      | 2.29  | 1509                    |
|                                                                                                                         | BDQ 0.25                                    | 5.26                                 | 2.17                                                      | 3.26  | 813                     |
|                                                                                                                         | BDQ 0.5                                     | 5.03                                 | 2.30                                                      | 2.22  | 1846                    |
|                                                                                                                         | BDQ 1                                       | 4.78                                 | 2.11                                                      | 1.80  | 2151                    |
|                                                                                                                         | BDQ 4                                       | 4.53                                 | 2.08                                                      | 2.83  | 3506                    |
|                                                                                                                         | IPM 4 + BDQ 0.00390625                      | 5.08                                 | 3.31                                                      | 3.53  | 16902                   |
|                                                                                                                         | IPM 4 + BDQ 0.0078125                       | 5.09                                 | 2.91                                                      | 3.43  | 6482                    |
|                                                                                                                         | IPM 4 + BDQ 0.015625                        | 5.16                                 | 2.58                                                      | 3.36  | 2630                    |
|                                                                                                                         | IPM 4 + BDQ 0.03125                         | 5.26                                 | 2.49                                                      | 3.24  | 1673                    |
|                                                                                                                         | IPM 4 + BDQ 0.0625                          | 5.22                                 | 2.19                                                      | 2.29  | 932                     |
|                                                                                                                         | IPM 4 + BDQ 0.125                           | 4.75                                 | 2.11                                                      | 2.80  | 2307                    |
|                                                                                                                         | IPM 4 + BDQ 0.25                            | 4.87                                 | 2.11                                                      | 2.82  | 1736                    |
|                                                                                                                         | IPM 4 + BDQ 0.5                             | 4.72                                 | 2.09                                                      | 1.90  | 2322                    |
|                                                                                                                         | IPM 4 + BDQ 1                               | 4.73                                 | 2.09                                                      | 2.85  | 2263                    |
|                                                                                                                         | IPM 4 + BDQ 4                               | 4.34                                 | 2.24                                                      | 2.68  | 7870                    |
|                                                                                                                         | IPM 16 + BDQ 0.00390625                     | 5.16                                 | 3.01                                                      | 2.87  | 7015                    |
|                                                                                                                         | IPM 16 + BDQ 0.0078125                      | 5.09                                 | 2.76                                                      | 2.81  | 4658                    |
|                                                                                                                         | IPM 16 + BDQ 0.015625                       | 4.99                                 | 2.56                                                      | 2.63  | 3720                    |
|                                                                                                                         | IPM 16 + BDQ 0.03125                        | 5.28                                 | 2.48                                                      | 2.39  | 1562                    |
|                                                                                                                         | IPM 16 + BDQ 0.0625                         | 5.33                                 | 2.32                                                      | 2.71  | 971                     |
|                                                                                                                         | IPM 16 + BDQ 0.125                          | 5.19                                 | 2.19                                                      | 2.02  | 991                     |
|                                                                                                                         | IPM 16 + BDQ 0.25                           | 4.79                                 | 2.37                                                      | 2.04  | 3800                    |
| IPM 16 + BDQ 0.5                                                                                                        | 5.66                                        | 2.16                                 | 2.79                                                      | 313   |                         |
| IPM 16 + BDQ 1                                                                                                          | 4.64                                        | 2.34                                 | 2.01                                                      | 4980  |                         |
| IPM 16 + BDQ 4                                                                                                          | 4.81                                        | 2.17                                 | 1.63                                                      | 2272  |                         |

Table continued on next page.

Table S8, continued.

| Strain, condition,<br>Day 0 bacterial burden,<br>figure number                                                    | Drug(s) and<br>concentration(s)<br>in µg/mL | Log <sub>10</sub> CFU/mL<br>at Day 3 | Log <sub>10</sub> RLU/mL at the<br>following time points: |       | MegaRLU/CFU<br>at Day 3 |
|-------------------------------------------------------------------------------------------------------------------|---------------------------------------------|--------------------------------------|-----------------------------------------------------------|-------|-------------------------|
|                                                                                                                   |                                             |                                      | Day 1                                                     | Day 3 |                         |
| <b>OM7 mutant,</b><br>CAMHB (no Tween),<br>Day 0 = 5.70 log <sub>10</sub> CFU/mL,<br><b>Fig. 6B,D; Fig. S5B,D</b> | No drug                                     | Clump                                | 3.27                                                      | 3.98  | nd                      |
|                                                                                                                   | IPM 4                                       | 4.45                                 | 3.89                                                      | 3.83  | 239354                  |
|                                                                                                                   | IPM 16                                      | 3.83                                 | 3.63                                                      | 3.59  | 566382                  |
|                                                                                                                   | BDQ 0.00390625                              | Clump                                | 3.38                                                      | 3.95  | nd                      |
|                                                                                                                   | BDQ 0.0078125                               | Clump                                | 3.27                                                      | 4.18  | nd                      |
|                                                                                                                   | BDQ 0.015625                                | Clump                                | 2.99                                                      | 4.12  | nd                      |
|                                                                                                                   | BDQ 0.03125                                 | Clump                                | 2.75                                                      | 4.14  | nd                      |
|                                                                                                                   | BDQ 0.0625                                  | 6.11                                 | 2.21                                                      | 3.77  | 4576                    |
|                                                                                                                   | BDQ 0.125                                   | 5.30                                 | 2.27                                                      | 4.53  | 169485                  |
|                                                                                                                   | BDQ 0.25                                    | 5.15                                 | 2.32                                                      | 4.43  | 192156                  |
|                                                                                                                   | BDQ 0.5                                     | 5.03                                 | 2.14                                                      | 2.44  | 2592                    |
|                                                                                                                   | BDQ 1                                       | 5.16                                 | 2.02                                                      | 2.52  | 2289                    |
|                                                                                                                   | BDQ 4                                       | 5.02                                 | 2.03                                                      | 2.30  | 1915                    |
|                                                                                                                   | IPM 4 + BDQ 0.00390625                      | 4.78                                 | 3.52                                                      | 3.65  | 73657                   |
|                                                                                                                   | IPM 4 + BDQ 0.0078125                       | 5.24                                 | 3.27                                                      | 3.49  | 17571                   |
|                                                                                                                   | IPM 4 + BDQ 0.015625                        | 5.49                                 | 2.95                                                      | 3.27  | 6024                    |
|                                                                                                                   | IPM 4 + BDQ 0.03125                         | 5.20                                 | 2.71                                                      | 3.18  | 9487                    |
|                                                                                                                   | IPM 4 + BDQ 0.0625                          | 5.20                                 | 2.55                                                      | 2.99  | 6118                    |
|                                                                                                                   | IPM 4 + BDQ 0.125                           | 5.36                                 | 2.29                                                      | 2.75  | 2417                    |
|                                                                                                                   | IPM 4 + BDQ 0.25                            | 5.20                                 | 2.22                                                      | 2.64  | 2699                    |
|                                                                                                                   | IPM 4 + BDQ 0.5                             | 4.90                                 | 2.23                                                      | 2.54  | 4303                    |
|                                                                                                                   | IPM 4 + BDQ 1                               | 4.78                                 | 2.16                                                      | 2.58  | 6301                    |
|                                                                                                                   | IPM 4 + BDQ 4                               | 5.00                                 | 2.30                                                      | 2.58  | 3773                    |
|                                                                                                                   | IPM 16 + BDQ 0.00390625                     | 4.60                                 | 3.14                                                      | 3.25  | 44835                   |
|                                                                                                                   | IPM 16 + BDQ 0.0078125                      | 4.85                                 | 2.93                                                      | 3.12  | 19020                   |
|                                                                                                                   | IPM 16 + BDQ 0.015625                       | 4.76                                 | 2.87                                                      | 3.04  | 19084                   |
|                                                                                                                   | IPM 16 + BDQ 0.03125                        | 5.23                                 | 2.75                                                      | 3.01  | 6047                    |
|                                                                                                                   | IPM 16 + BDQ 0.0625                         | 5.27                                 | 2.73                                                      | 2.82  | 3577                    |
|                                                                                                                   | IPM 16 + BDQ 0.125                          | 5.13                                 | 2.38                                                      | 2.70  | 3709                    |
|                                                                                                                   | IPM 16 + BDQ 0.25                           | 5.03                                 | 2.29                                                      | 2.55  | 3275                    |
|                                                                                                                   | IPM 16 + BDQ 0.5                            | 4.79                                 | 2.17                                                      | 2.50  | 5090                    |
|                                                                                                                   | IPM 16 + BDQ 1                              | 5.26                                 | 2.15                                                      | 2.47  | 1616                    |
| IPM 16 + BDQ 4                                                                                                    | 5.01                                        | 2.28                                 | 2.29                                                      | 1898  |                         |

"Clump" indicates that the bacteria had overgrown and formed clumps, precluding CFU quantification. nd indicates not determined (due to lack of CFU count data).

**Table S9. CFU and relative light unit (RLU) data from samples presented in Fig. S4.** Assay medium was CAMHB without Tween 80. Red shading indicates bedaquiline (BDQ) samples, blue shading indicates imipenem (IPM) samples, and gray shading indicates IPM + BDQ samples.

| Strain, condition,<br>Day 0 bacterial burden,<br>figure number                                         | Drug(s) and<br>concentration(s)<br>in µg/mL | Log <sub>10</sub> CFU/mL at the<br>following time points: |       | Log <sub>10</sub> RLU/mL at the<br>following time points: |       |       | MegaRLU/CFU at the<br>following time points: |       |
|--------------------------------------------------------------------------------------------------------|---------------------------------------------|-----------------------------------------------------------|-------|-----------------------------------------------------------|-------|-------|----------------------------------------------|-------|
|                                                                                                        |                                             | Day 1                                                     | Day 3 | Hour 4                                                    | Day 1 | Day 3 | Day 1                                        | Day 3 |
| ATCC 19977 WT,<br>CAMHB (no Tween),<br>Day 0 = 5.95 log <sub>10</sub> CFU/mL,<br>Fig. S4 (replicate 2) | No drug                                     | 7.01                                                      | Clump | 1.87                                                      | 2.90  | 4.04  | 77                                           | nd    |
|                                                                                                        | IPM 4                                       | 5.68                                                      | 5.29  | 2.72                                                      | 3.78  | 4.11  | 12490                                        | 65650 |
|                                                                                                        | IPM 16                                      | 5.02                                                      | 4.68  | 3.09                                                      | 3.65  | 3.66  | 43291                                        | 94145 |
|                                                                                                        | BDQ 0.00390625                              | 6.66                                                      | Clump | 2.38                                                      | 3.17  | 3.74  | 323                                          | nd    |
|                                                                                                        | BDQ 0.0078125                               | 6.35                                                      | Clump | 2.41                                                      | 3.00  | 3.93  | 443                                          | nd    |
|                                                                                                        | BDQ 0.015625                                | 5.98                                                      | 6.41  | 2.17                                                      | 2.51  | 4.05  | 341                                          | 4341  |
|                                                                                                        | BDQ 0.03125                                 | 5.81                                                      | 5.78  | 1.28                                                      | 2.19  | 3.38  | 243                                          | 4007  |
|                                                                                                        | BDQ 0.0625                                  | 5.76                                                      | 5.76  | 1.50                                                      | 2.24  | 2.42  | 296                                          | 449   |
|                                                                                                        | BDQ 0.125                                   | 5.70                                                      | 5.72  | 1.56                                                      | 2.06  | 2.38  | 231                                          | 459   |
|                                                                                                        | BDQ 0.25                                    | 5.70                                                      | 5.60  | 1.95                                                      | 1.89  | 2.30  | 154                                          | 502   |
|                                                                                                        | BDQ 0.5                                     | 5.66                                                      | 5.34  | not detected                                              | 1.91  | 2.24  | 176                                          | 789   |
|                                                                                                        | BDQ 1                                       | 5.75                                                      | 5.29  | not detected                                              | 1.87  | 2.08  | 131                                          | 613   |
|                                                                                                        | BDQ 4                                       | 5.58                                                      | 5.32  | not detected                                              | 1.64  | 1.66  | 114                                          | 217   |
|                                                                                                        | IPM 4 + BDQ 0.00390625                      | 5.70                                                      | 5.13  | 2.53                                                      | 3.47  | 3.62  | 5864                                         | 30496 |
|                                                                                                        | IPM 4 + BDQ 0.0078125                       | 5.48                                                      | 5.62  | 2.69                                                      | 3.41  | 3.43  | 8651                                         | 6400  |
|                                                                                                        | IPM 4 + BDQ 0.015625                        | 5.76                                                      | 5.48  | 2.10                                                      | 3.01  | 3.16  | 1781                                         | 4850  |
|                                                                                                        | IPM 4 + BDQ 0.03125                         | 5.92                                                      | 5.68  | 1.64                                                      | 2.59  | 2.94  | 464                                          | 1813  |
|                                                                                                        | IPM 4 + BDQ 0.0625                          | 5.66                                                      | 5.78  | 2.14                                                      | 2.32  | 2.61  | 455                                          | 682   |
|                                                                                                        | IPM 4 + BDQ 0.125                           | 5.70                                                      | 5.60  | 2.10                                                      | 2.20  | 2.44  | 321                                          | 684   |
|                                                                                                        | IPM 4 + BDQ 0.25                            | 5.75                                                      | 5.28  | 2.21                                                      | 2.04  | 2.68  | 194                                          | 2479  |
|                                                                                                        | IPM 4 + BDQ 0.5                             | 5.70                                                      | 5.32  | 1.73                                                      | 2.14  | 2.10  | 276                                          | 606   |
|                                                                                                        | IPM 4 + BDQ 1                               | 5.87                                                      | 5.30  | 1.70                                                      | 1.85  | 2.04  | 96                                           | 545   |
|                                                                                                        | IPM 4 + BDQ 4                               | 5.48                                                      | 5.24  | 1.30                                                      | 1.72  | 1.87  | 173                                          | 427   |
|                                                                                                        | IPM 16 + BDQ 0.00390625                     | 5.68                                                      | 5.53  | 2.87                                                      | 3.27  | 3.30  | 3859                                         | 5841  |
|                                                                                                        | IPM 16 + BDQ 0.0078125                      | 5.75                                                      | 5.51  | 2.85                                                      | 3.20  | 3.14  | 2839                                         | 4351  |
|                                                                                                        | IPM 16 + BDQ 0.015625                       | 5.75                                                      | 5.51  | 2.54                                                      | 2.95  | 2.99  | 1604                                         | 3050  |
|                                                                                                        | IPM 16 + BDQ 0.03125                        | 5.81                                                      | 5.66  | 1.78                                                      | 2.73  | 2.86  | 833                                          | 1558  |
|                                                                                                        | IPM 16 + BDQ 0.0625                         | 5.78                                                      | 5.68  | 2.05                                                      | 2.29  | 2.69  | 322                                          | 1011  |
| IPM 16 + BDQ 0.125                                                                                     | 5.64                                        | 5.73                                                      | 1.81  | 2.02                                                      | 2.47  | 240   | 549                                          |       |
| IPM 16 + BDQ 0.25                                                                                      | 5.78                                        | 5.56                                                      | 2.13  | 2.10                                                      | 2.36  | 212   | 642                                          |       |
| IPM 16 + BDQ 0.5                                                                                       | 5.68                                        | 5.64                                                      | 1.73  | 2.10                                                      | 2.18  | 260   | 347                                          |       |
| IPM 16 + BDQ 1                                                                                         | 5.82                                        | 5.14                                                      | 1.61  | 1.98                                                      | 2.15  | 145   | 1020                                         |       |
| IPM 16 + BDQ 4                                                                                         | 5.64                                        | 5.09                                                      | 1.68  | 1.66                                                      | 2.02  | 103   | 838                                          |       |

“Clump” indicates that the bacteria had overgrown and formed clumps, precluding CFU quantification. nd indicates not determined (due to lack of CFU count data).



**Table S10. CFU and relative fluorescence unit (RLU) data from samples presented in Fig. 7, Fig. S6, Fig. S7, and Fig. S8.** Bacteria were nutrient-starved in PBS for 14 days (NS-14) prior to drug exposure. Drug activity assays were performed in PBS without Tween 80. Red shading indicates bedaquiline (BDQ) samples, blue shading indicates imipenem (IPM) samples, and gray shading indicates IPM + BDQ samples.

| Strain, condition,<br>Day 0 bacterial burden,<br>figure number                                                     | Drug(s) and<br>concentration(s)<br>in µg/mL | Log <sub>10</sub> CFU/mL at the<br>following time points: |       | Log <sub>10</sub> RLU/mL at the<br>following time points: |       |       |         | MegaRLU/CFU at the<br>following time points: |          |
|--------------------------------------------------------------------------------------------------------------------|---------------------------------------------|-----------------------------------------------------------|-------|-----------------------------------------------------------|-------|-------|---------|----------------------------------------------|----------|
|                                                                                                                    |                                             | Day 3                                                     | Day 7 | Hour 4                                                    | Day 1 | Day 3 | Day 7   | Day 3                                        | Day 7    |
| ATCC 19977 WT,<br>NS-14 (no Tween),<br>Day 0 = 6.25 log <sub>10</sub> CFU/mL,<br>Fig. 7A,C; Fig. S6A,C;<br>Fig. S7 | No drug                                     | 6.26                                                      | 6.20  | 2.44                                                      | 2.39  | 2.40  | 2.58    | 135                                          | 241      |
|                                                                                                                    | IPM 4                                       | 6.12                                                      | 6.68  | 2.45                                                      | 2.47  | 2.60  | 2.91    | 302                                          | 170      |
|                                                                                                                    | IPM 16                                      | 6.09                                                      | 5.95  | 2.49                                                      | 2.52  | 2.65  | 2.92    | 357                                          | 918      |
|                                                                                                                    | BDQ 0.00390625                              | 6.23                                                      | 6.07  | 2.52                                                      | 2.44  | 2.47  | 2.62    | 178                                          | 355      |
|                                                                                                                    | BDQ 0.0078125                               | 6.13                                                      | 6.20  | 2.45                                                      | 2.41  | 2.45  | 2.63    | 208                                          | 264      |
|                                                                                                                    | BDQ 0.015625                                | 6.18                                                      | 6.23  | 2.48                                                      | 2.46  | 2.43  | 2.62    | 178                                          | 250      |
|                                                                                                                    | BDQ 0.03125                                 | 6.17                                                      | 6.18  | 2.37                                                      | 2.25  | 2.31  | 2.48    | 138                                          | 200      |
|                                                                                                                    | BDQ 0.0625                                  | 6.09                                                      | 6.18  | 2.34                                                      | 2.24  | 2.25  | 2.46    | 145                                          | 188      |
|                                                                                                                    | BDQ 0.125                                   | 5.90                                                      | 6.53  | 2.32                                                      | 2.18  | 2.23  | 2.42    | 213                                          | 78       |
|                                                                                                                    | BDQ 0.25                                    | 5.53                                                      | 5.36  | 2.49                                                      | 2.18  | 2.20  | 2.34    | 471                                          | 953      |
|                                                                                                                    | BDQ 0.5                                     | 5.13                                                      | 4.48  | 2.34                                                      | 2.18  | 2.21  | 2.31    | 1182                                         | 6752     |
|                                                                                                                    | BDQ 1                                       | 4.16                                                      | 3.89  | 2.34                                                      | 2.20  | 2.21  | 2.33    | 11142                                        | 27340    |
|                                                                                                                    | BDQ 4                                       | 2.21                                                      | 0.95  | 2.29                                                      | 2.17  | 2.18  | 2.30    | 938750                                       | 25137500 |
|                                                                                                                    | IPM 4 + BDQ 0.00390625                      | 5.93                                                      | 6.48  | 2.44                                                      | 2.50  | 2.63  | 2.84    | 499                                          | 229      |
|                                                                                                                    | IPM 4 + BDQ 0.0078125                       | 6.28                                                      | 6.56  | 2.42                                                      | 2.47  | 2.61  | 2.86    | 213                                          | 203      |
|                                                                                                                    | IPM 4 + BDQ 0.015625                        | 5.83                                                      | 6.48  | 2.38                                                      | 2.43  | 2.58  | 2.88    | 565                                          | 255      |
|                                                                                                                    | IPM 4 + BDQ 0.03125                         | 6.07                                                      | 6.38  | 2.31                                                      | 2.26  | 2.33  | 2.87    | 183                                          | 307      |
|                                                                                                                    | IPM 4 + BDQ 0.0625                          | 6.00                                                      | 6.51  | 2.34                                                      | 2.25  | 2.36  | 2.77    | 230                                          | 186      |
|                                                                                                                    | IPM 4 + BDQ 0.125                           | 5.93                                                      | 6.17  | 2.27                                                      | 2.21  | 2.25  | 2.60    | 206                                          | 270      |
|                                                                                                                    | IPM 4 + BDQ 0.25                            | 5.64                                                      | 5.22  | 2.28                                                      | 2.18  | 2.23  | 2.46    | 382                                          | 1730     |
|                                                                                                                    | IPM 4 + BDQ 0.5                             | 5.06                                                      | 4.37  | 2.33                                                      | 2.18  | 2.23  | 2.34    | 1450                                         | 9322     |
|                                                                                                                    | IPM 4 + BDQ 1                               | 3.03                                                      | 4.27  | 2.35                                                      | 2.20  | 2.20  | 2.22    | 147685                                       | 8750     |
|                                                                                                                    | IPM 4 + BDQ 4                               | 2.15                                                      | 2.38  | 2.32                                                      | 2.18  | 2.21  | 2.21    | 1158214                                      | 675208   |
|                                                                                                                    | IPM 16 + BDQ 0.00390625                     | 6.24                                                      | 5.89  | 2.41                                                      | 2.50  | 2.58  | 2.79    | 223                                          | 782      |
|                                                                                                                    | IPM 16 + BDQ 0.0078125                      | 6.33                                                      | 5.76  | 2.52                                                      | 2.48  | 2.54  | 2.78    | 163                                          | 1051     |
|                                                                                                                    | IPM 16 + BDQ 0.015625                       | 6.18                                                      | 5.75  | 2.33                                                      | 2.38  | 2.45  | 2.66    | 186                                          | 808      |
|                                                                                                                    | IPM 16 + BDQ 0.03125                        | 5.91                                                      | 5.93  | 2.47                                                      | 2.29  | 2.41  | 2.64    | 311                                          | 503      |
|                                                                                                                    | IPM 16 + BDQ 0.0625                         | 5.91                                                      | 5.28  | 2.33                                                      | 2.22  | 2.27  | 2.43    | 228                                          | 1412     |
|                                                                                                                    | IPM 16 + BDQ 0.125                          | 5.68                                                      | 5.07  | 2.27                                                      | 2.19  | 2.21  | 2.39    | 336                                          | 2059     |
|                                                                                                                    | IPM 16 + BDQ 0.25                           | 5.41                                                      | 4.86  | 2.31                                                      | 2.18  | 2.25  | 2.38    | 679                                          | 3347     |
| IPM 16 + BDQ 0.5                                                                                                   | 4.90                                        | 4.48                                                      | 2.32  | 2.18                                                      | 2.22  | 2.33  | 2096    | 7125                                         |          |
| IPM 16 + BDQ 1                                                                                                     | 3.82                                        | 3.70                                                      | 2.33  | 2.19                                                      | 2.17  | 2.33  | 22515   | 42660                                        |          |
| IPM 16 + BDQ 4                                                                                                     | 1.79                                        | 0.95                                                      | 2.36  | 2.15                                                      | 2.19  | 2.32  | 2594167 | 25987500                                     |          |

Table continued on next page.

Table S10, continued.

| Strain, condition,<br>Day 0 bacterial burden,<br>figure number                                                                       | Drug(s) and<br>concentration(s)<br>in µg/mL | Log <sub>10</sub> CFU/mL at the<br>following time points: |       | Log <sub>10</sub> RLU/mL at the<br>following time points: |       |       |       | MegaRLU/CFU at the<br>following time points: |       |
|--------------------------------------------------------------------------------------------------------------------------------------|---------------------------------------------|-----------------------------------------------------------|-------|-----------------------------------------------------------|-------|-------|-------|----------------------------------------------|-------|
|                                                                                                                                      |                                             | Day 3                                                     | Day 7 | Hour 4                                                    | Day 1 | Day 3 | Day 7 | Day 3                                        | Day 7 |
| <b>OM7 mutant,</b><br>NS-14 (no Tween),<br>Day 0 = 6.29 log <sub>10</sub> CFU/mL,<br><b>Fig. 7B,D; Fig. S6B,D;</b><br><b>Fig. S8</b> | No drug                                     | 6.42                                                      | 6.82  | 2.30                                                      | 2.34  | 2.31  | 2.52  | 78                                           | 50    |
|                                                                                                                                      | IPM 4                                       | 6.43                                                      | 6.58  | 2.36                                                      | 2.47  | 2.61  | 2.91  | 150                                          | 215   |
|                                                                                                                                      | IPM 16                                      | 6.26                                                      | 6.12  | 2.41                                                      | 2.46  | 2.51  | 2.85  | 174                                          | 536   |
|                                                                                                                                      | BDQ 0.00390625                              | 6.31                                                      | 6.32  | 2.40                                                      | 2.45  | 2.36  | 2.53  | 113                                          | 162   |
|                                                                                                                                      | BDQ 0.0078125                               | 6.23                                                      | 6.27  | 2.35                                                      | 2.29  | 2.29  | 2.48  | 115                                          | 159   |
|                                                                                                                                      | BDQ 0.015625                                | 6.30                                                      | 5.91  | 2.48                                                      | 2.41  | 2.41  | 2.58  | 128                                          | 468   |
|                                                                                                                                      | BDQ 0.03125                                 | 6.26                                                      | 6.19  | 2.35                                                      | 2.35  | 2.32  | 2.52  | 113                                          | 213   |
|                                                                                                                                      | BDQ 0.0625                                  | 6.20                                                      | 6.26  | 2.30                                                      | 2.22  | 2.25  | 2.43  | 112                                          | 148   |
|                                                                                                                                      | BDQ 0.125                                   | 6.15                                                      | 6.21  | 2.28                                                      | 2.14  | 2.18  | 2.42  | 107                                          | 161   |
|                                                                                                                                      | BDQ 0.25                                    | 6.11                                                      | 6.03  | 2.22                                                      | 2.10  | 2.09  | 2.31  | 95                                           | 192   |
|                                                                                                                                      | BDQ 0.5                                     | 6.00                                                      | 6.02  | 2.21                                                      | 2.13  | 2.14  | 2.35  | 138                                          | 215   |
|                                                                                                                                      | BDQ 1                                       | 5.83                                                      | 5.51  | 2.22                                                      | 2.12  | 2.09  | 2.24  | 182                                          | 544   |
|                                                                                                                                      | BDQ 4                                       | 4.51                                                      | 3.43  | 2.23                                                      | 2.12  | 2.09  | 2.19  | 3838                                         | 57854 |
|                                                                                                                                      | IPM 4 + BDQ 0.00390625                      | 6.25                                                      | 6.25  | 2.39                                                      | 2.50  | 2.56  | 2.84  | 206                                          | 390   |
|                                                                                                                                      | IPM 4 + BDQ 0.0078125                       | 6.25                                                      | 6.08  | 2.37                                                      | 2.43  | 2.49  | 2.87  | 175                                          | 612   |
|                                                                                                                                      | IPM 4 + BDQ 0.015625                        | 6.26                                                      | 6.56  | 2.39                                                      | 2.50  | 2.53  | 2.88  | 188                                          | 212   |
|                                                                                                                                      | IPM 4 + BDQ 0.03125                         | 6.25                                                      | 5.94  | 2.29                                                      | 2.42  | 2.45  | 2.87  | 161                                          | 838   |
|                                                                                                                                      | IPM 4 + BDQ 0.0625                          | 6.26                                                      | 6.19  | 2.29                                                      | 2.34  | 2.37  | 2.77  | 131                                          | 386   |
|                                                                                                                                      | IPM 4 + BDQ 0.125                           | 6.11                                                      | 6.30  | 2.25                                                      | 2.21  | 2.26  | 2.60  | 143                                          | 200   |
|                                                                                                                                      | IPM 4 + BDQ 0.25                            | 5.89                                                      | 6.47  | 2.21                                                      | 2.19  | 2.19  | 2.46  | 200                                          | 98    |
|                                                                                                                                      | IPM 4 + BDQ 0.5                             | 6.06                                                      | 6.20  | 2.20                                                      | 2.14  | 2.09  | 2.34  | 109                                          | 138   |
|                                                                                                                                      | IPM 4 + BDQ 1                               | 5.53                                                      | 5.26  | 2.24                                                      | 2.10  | 2.09  | 2.22  | 359                                          | 894   |
|                                                                                                                                      | IPM 4 + BDQ 4                               | 4.86                                                      | 3.68  | 2.25                                                      | 2.11  | 2.07  | 2.21  | 1644                                         | 33760 |
|                                                                                                                                      | IPM 16 + BDQ 0.00390625                     | 6.33                                                      | 6.05  | 2.38                                                      | 2.48  | 2.49  | 2.88  | 143                                          | 673   |
|                                                                                                                                      | IPM 16 + BDQ 0.0078125                      | 6.12                                                      | 5.87  | 2.34                                                      | 2.44  | 2.46  | 2.84  | 219                                          | 936   |
|                                                                                                                                      | IPM 16 + BDQ 0.015625                       | 6.11                                                      | 5.97  | 2.39                                                      | 2.43  | 2.45  | 2.76  | 220                                          | 606   |
|                                                                                                                                      | IPM 16 + BDQ 0.03125                        | 6.20                                                      | 5.79  | 2.37                                                      | 2.33  | 2.38  | 2.69  | 153                                          | 799   |
|                                                                                                                                      | IPM 16 + BDQ 0.0625                         | 6.09                                                      | 5.68  | 2.31                                                      | 2.26  | 2.32  | 2.63  | 170                                          | 880   |
|                                                                                                                                      | IPM 16 + BDQ 0.125                          | 5.81                                                      | 5.60  | 2.23                                                      | 2.19  | 2.26  | 2.44  | 281                                          | 693   |
|                                                                                                                                      | IPM 16 + BDQ 0.25                           | 5.86                                                      | 5.45  | 2.26                                                      | 2.21  | 2.17  | 2.38  | 205                                          | 851   |
| IPM 16 + BDQ 0.5                                                                                                                     | 5.87                                        | 5.16                                                      | 2.26  | 2.15                                                      | 2.18  | 2.31  | 202   | 1401                                         |       |
| IPM 16 + BDQ 1                                                                                                                       | 5.58                                        | 4.66                                                      | 2.21  | 2.10                                                      | 2.09  | 2.23  | 327   | 3682                                         |       |
| IPM 16 + BDQ 4                                                                                                                       | 4.89                                        | 3.79                                                      | 2.25  | 2.19                                                      | 2.13  | 2.22  | 1748  | 26782                                        |       |

**Table S11. CFU data from samples presented in Fig. 8 and Fig. S9.** Bacteria were nutrient-starved in PBS for 20 days (NS-20) prior to drug exposure. Drug activity assays were performed in PBS with 0.05% Tween 80. Red shading indicates bedaquiline (BDQ) samples, blue shading indicates imipenem (IPM) samples, and gray shading indicates IPM + BDQ samples.

| Strain, condition,<br>Day 0 bacterial burden,<br>figure number                                                           | Drug(s) and<br>concentration(s)<br>in µg/mL                                                                   | Log <sub>10</sub> CFU/mL at the<br>following time points: |         |
|--------------------------------------------------------------------------------------------------------------------------|---------------------------------------------------------------------------------------------------------------|-----------------------------------------------------------|---------|
|                                                                                                                          |                                                                                                               | Day 1                                                     | Day 4   |
| ATCC 19977 WT,<br>NS-20 + Tween,<br>Day 0 = 6.07 log <sub>10</sub> CFU/mL,<br><b>Fig. 8; Fig. S9A,C</b><br>(replicate 1) | No drug                                                                                                       | 5.68                                                      | 5.48    |
|                                                                                                                          | IPM 4                                                                                                         | 5.33                                                      | 2.27    |
|                                                                                                                          | IPM 8                                                                                                         | 4.26                                                      | 1.36    |
|                                                                                                                          | IPM 16                                                                                                        | 4.60                                                      | 1.18    |
|                                                                                                                          | BDQ 0.00390625                                                                                                | 5.56                                                      | 5.96    |
|                                                                                                                          | BDQ 0.0625                                                                                                    | 5.37                                                      | 5.51    |
|                                                                                                                          | BDQ 1                                                                                                         | 5.32                                                      | 5.04    |
|                                                                                                                          | BDQ 4                                                                                                         | 5.13                                                      | 4.66    |
|                                                                                                                          | IPM 4 + BDQ 0.00390625                                                                                        | 5.62                                                      | 4.26    |
|                                                                                                                          | IPM 4 + BDQ 0.0625                                                                                            | 5.33                                                      | 4.90    |
|                                                                                                                          | IPM 4 + BDQ 0.25                                                                                              | 5.35                                                      | 5.23    |
|                                                                                                                          | IPM 4 + BDQ 1                                                                                                 | 5.15                                                      | 4.95    |
|                                                                                                                          | IPM 4 + BDQ 4                                                                                                 | 5.08                                                      | 4.56    |
|                                                                                                                          | ATCC 19977 WT,<br>NS-20 + Tween,<br>Day 0 = 6.38 log <sub>10</sub> CFU/mL,<br><b>Fig. S9B,D</b> (replicate 2) | No drug                                                   | 6.38    |
| IPM 4                                                                                                                    |                                                                                                               | 5.97                                                      | Contam. |
| IPM 8                                                                                                                    |                                                                                                               | 5.60                                                      | 2.08    |
| IPM 16                                                                                                                   |                                                                                                               | 4.88                                                      | 0.00    |
| BDQ 0.00390625                                                                                                           |                                                                                                               | 6.37                                                      | 6.22    |
| BDQ 0.0625                                                                                                               |                                                                                                               | 5.94                                                      | 6.21    |
| BDQ 1                                                                                                                    |                                                                                                               | 6.04                                                      | 5.89    |
| BDQ 4                                                                                                                    |                                                                                                               | 6.05                                                      | 5.37    |
| IPM 4 + BDQ 0.00390625                                                                                                   |                                                                                                               | 6.15                                                      | 5.89    |
| IPM 4 + BDQ 0.0625                                                                                                       |                                                                                                               | 6.03                                                      | 5.94    |
| IPM 4 + BDQ 0.25                                                                                                         |                                                                                                               | 6.11                                                      | 5.56    |
| IPM 4 + BDQ 1                                                                                                            |                                                                                                               | 6.06                                                      | 5.81    |
| IPM 4 + BDQ 4                                                                                                            |                                                                                                               | 6.01                                                      | 5.29    |

"Contam." indicates that bacterial or fungal contamination precluded assessment of this sample.

**Table S12. CFU data from samples presented in Fig. S10.** Bacteria were nutrient-starved in PBS for 20 days (NS-20) prior to drug exposure. Drug activity assays were performed in PBS with or without 0.05% Tween 80. Red shading indicates bedaquiline (BDQ) samples; blue shading indicates imipenem (IPM) samples; gray shading indicates IPM + BDQ samples.

| Strain, condition, Day 0 bacterial burden, figure number                                                 | Drug(s) and concentration(s) in µg/mL | Log <sub>10</sub> CFU/mL at Day 3 |
|----------------------------------------------------------------------------------------------------------|---------------------------------------|-----------------------------------|
| <b>ATCC 19977 WT,</b><br>NS-20 (no Tween),<br>Day 0 = 6.48 log <sub>10</sub> CFU/mL,<br><b>Fig. S10A</b> | No drug                               | 6.29                              |
|                                                                                                          | IPM 2                                 | 6.32                              |
|                                                                                                          | IPM 4                                 | 6.47                              |
|                                                                                                          | IPM 8                                 | 6.43                              |
|                                                                                                          | IPM 16                                | 6.48                              |
|                                                                                                          | IPM 64                                | 6.02                              |
|                                                                                                          | BDQ 0.00390625                        | 6.56                              |
|                                                                                                          | BDQ 0.015625                          | 6.07                              |
|                                                                                                          | BDQ 0.0625                            | 5.88                              |
|                                                                                                          | BDQ 1                                 | 4.75                              |
|                                                                                                          | BDQ 4                                 | 4.66                              |
|                                                                                                          | IPM 4 + BDQ 0.00390625                | 6.06                              |
|                                                                                                          | IPM 4 + BDQ 0.0625                    | 6.11                              |
|                                                                                                          | IPM 4 + BDQ 0.25                      | 5.82                              |
|                                                                                                          | IPM 4 + BDQ 1                         | 4.89                              |
|                                                                                                          | IPM 4 + BDQ 4                         | 4.38                              |
|                                                                                                          | IPM 16 + BDQ 0.00390625               | 6.32                              |
|                                                                                                          | IPM 16 + BDQ 0.0625                   | 5.62                              |
|                                                                                                          | IPM 16 + BDQ 0.25                     | 5.58                              |
|                                                                                                          | IPM 16 + BDQ 1                        | 4.86                              |
| IPM 16 + BDQ 4                                                                                           | 4.08                                  |                                   |
| <b>ATCC 19977 WT,</b><br>NS-20 + Tween,<br>Day 0 = 6.51 log <sub>10</sub> CFU/mL,<br><b>Fig. S10B</b>    | No drug                               | 6.45                              |
|                                                                                                          | IPM 4                                 | nd                                |
|                                                                                                          | IPM 16                                | nd                                |
|                                                                                                          | BDQ 0.00390625                        | 6.66                              |
|                                                                                                          | BDQ 0.015625                          | 6.48                              |
|                                                                                                          | BDQ 0.0625                            | 6.36                              |
|                                                                                                          | BDQ 1                                 | 6.02                              |
|                                                                                                          | BDQ 4                                 | 5.72                              |
|                                                                                                          | IPM 4 + BDQ 0.00390625                | 6.32                              |
|                                                                                                          | IPM 4 + BDQ 0.0625                    | 6.23                              |
|                                                                                                          | IPM 4 + BDQ 0.25                      | 6.29                              |
|                                                                                                          | IPM 4 + BDQ 1                         | 5.98                              |
|                                                                                                          | IPM 4 + BDQ 4                         | 5.79                              |
|                                                                                                          | IPM 16 + BDQ 0.00390625               | 4.41                              |
|                                                                                                          | IPM 16 + BDQ 0.0625                   | 4.76                              |
|                                                                                                          | IPM 16 + BDQ 0.25                     | 5.70                              |
| IPM 16 + BDQ 1                                                                                           | 6.24                                  |                                   |
| IPM 16 + BDQ 4                                                                                           | 5.78                                  |                                   |

nd, not determined (samples lost).

**Table S13. CFU data from intracellular samples presented in Fig. 9 and Fig. S11.** Within each biological replicate, data from up to 3 technical replicates were acquired for each group at each time point. Red shading indicates bedaquiline (BDQ) samples; blue shading indicates imipenem (IPM) samples; gray shading indicates IPM + BDQ samples.

| Strain, condition, replicate, figure number                                                                                                                    | Drug(s) and concentration(s) in µg/mL | Technical replicate | Intracellular log <sub>10</sub> CFU/mL at |       |       |
|----------------------------------------------------------------------------------------------------------------------------------------------------------------|---------------------------------------|---------------------|-------------------------------------------|-------|-------|
|                                                                                                                                                                |                                       |                     | Day 0                                     | Day 3 | Day 5 |
| ATCC 19977 WT, Intracellular (THP-1 cells) assay with MOI 1:10, Biological replicate 1, Fig. 9A; Fig. S11A,D                                                   | No drug                               | 1                   | 4.06                                      | 6.58  | 7.19  |
|                                                                                                                                                                |                                       | 2                   | 4.03                                      | 6.62  | 6.97  |
|                                                                                                                                                                |                                       | 3                   | 4.11                                      | 6.78  | 6.96  |
|                                                                                                                                                                | BDQ 0.25                              | 1                   | ---                                       | 5.34  | 6.93  |
|                                                                                                                                                                |                                       | 2                   | ---                                       | 5.41  | 6.86  |
|                                                                                                                                                                |                                       | 3                   | ---                                       | 5.64  | 7.10  |
|                                                                                                                                                                | BDQ 1                                 | 1                   | ---                                       | 4.64  | 5.15  |
|                                                                                                                                                                |                                       | 2                   | ---                                       | 4.34  | 5.38  |
|                                                                                                                                                                |                                       | 3                   | ---                                       | 4.64  | 5.35  |
|                                                                                                                                                                | BDQ 4                                 | 1                   | ---                                       | ---   | 3.11  |
|                                                                                                                                                                |                                       | 2                   | ---                                       | 3.53  | 3.61  |
|                                                                                                                                                                |                                       | 3                   | ---                                       | 3.15  | 3.11  |
|                                                                                                                                                                | BDQ 16                                | 1                   | ---                                       | 3.23  | 2.15  |
|                                                                                                                                                                |                                       | 2                   | ---                                       | 2.94  | 1.90  |
|                                                                                                                                                                |                                       | 3                   | ---                                       | ---   | 1.04  |
|                                                                                                                                                                | IPM 8                                 | 1                   | ---                                       | 4.79  | 5.00  |
|                                                                                                                                                                |                                       | 2                   | ---                                       | 5.25  | 5.33  |
|                                                                                                                                                                |                                       | 3                   | ---                                       | 5.09  | 5.10  |
|                                                                                                                                                                | IPM 16                                | 1                   | ---                                       | 4.51  | 4.38  |
|                                                                                                                                                                |                                       | 2                   | ---                                       | 4.64  | 4.30  |
|                                                                                                                                                                |                                       | 3                   | ---                                       | ---   | 4.26  |
|                                                                                                                                                                | IPM 32                                | 1                   | ---                                       | ---   | 4.00  |
|                                                                                                                                                                |                                       | 2                   | ---                                       | 4.53  | 4.24  |
|                                                                                                                                                                |                                       | 3                   | ---                                       | ---   | 4.09  |
| IPM 64                                                                                                                                                         | 1                                     | ---                 | ---                                       | 3.85  |       |
|                                                                                                                                                                | 2                                     | ---                 | 4.18                                      | 3.82  |       |
|                                                                                                                                                                | 3                                     | ---                 | ---                                       | 3.78  |       |
| IPM 32 + BDQ 1                                                                                                                                                 | 1                                     | ---                 | 3.90                                      | ---   |       |
|                                                                                                                                                                | 2                                     | ---                 | 3.75                                      | 2.92  |       |
|                                                                                                                                                                | 3                                     | ---                 | 3.42                                      | ---   |       |
| IPM 64 + BDQ 1                                                                                                                                                 | 1                                     | ---                 | 3.73                                      | ---   |       |
|                                                                                                                                                                | 2                                     | ---                 | 3.56                                      | ---   |       |
|                                                                                                                                                                | 3                                     | ---                 | 3.89                                      | 2.73  |       |
| ATCC 19977 WT, Intracellular (THP-1 cells) assay with MOI 1:10, Biological replicate 2, Fig. 9B; Fig. S11B,E; plus additional combination data not in a figure | No drug                               | 1                   | 3.82                                      | 4.96  | 6.93  |
|                                                                                                                                                                |                                       | 2                   | 3.90                                      | 4.89  | 6.73  |
|                                                                                                                                                                |                                       | 3                   | 3.76                                      | 5.03  | 6.76  |
|                                                                                                                                                                | BDQ 0.25                              | 1                   | ---                                       | 4.01  | ---   |
|                                                                                                                                                                |                                       | 2                   | ---                                       | 4.30  | ---   |
|                                                                                                                                                                |                                       | 3                   | ---                                       | ---   | ---   |
|                                                                                                                                                                | BDQ 0.5                               | 1                   | ---                                       | 3.27  | 4.41  |
|                                                                                                                                                                |                                       | 2                   | ---                                       | 3.54  | 4.49  |
|                                                                                                                                                                |                                       | 3                   | ---                                       | ---   | 4.47  |
|                                                                                                                                                                | BDQ 1                                 | 1                   | ---                                       | 2.72  | 3.97  |
|                                                                                                                                                                |                                       | 2                   | ---                                       | 2.92  | 4.10  |
|                                                                                                                                                                |                                       | 3                   | ---                                       | 2.90  | 4.28  |
|                                                                                                                                                                | IPM 8                                 | 1                   | ---                                       | 4.02  | 3.78  |
|                                                                                                                                                                |                                       | 2                   | ---                                       | 3.98  | 3.89  |
|                                                                                                                                                                |                                       | 3                   | ---                                       | 3.92  | 3.53  |
|                                                                                                                                                                | IPM 32                                | 1                   | ---                                       | 3.51  | 3.26  |
|                                                                                                                                                                |                                       | 2                   | ---                                       | 3.39  | 3.31  |
|                                                                                                                                                                |                                       | 3                   | ---                                       | 3.45  | 3.12  |

Table continued on next page.

**Table S13, continued**

| Strain, condition, replicate, figure number                                                                                                                                                      | Drug(s) and concentration(s) in µg/mL | Technical replicate | Intracellular log <sub>10</sub> CFU/mL at |       |       |
|--------------------------------------------------------------------------------------------------------------------------------------------------------------------------------------------------|---------------------------------------|---------------------|-------------------------------------------|-------|-------|
|                                                                                                                                                                                                  |                                       |                     | Day 0                                     | Day 3 | Day 5 |
| <b>ATCC 19977 WT,</b><br>Intracellular (THP-1 cells)<br>assay with MOI 1:10,<br>Biological replicate 2,<br><b>Fig. 9B; Fig. S11B,E; plus<br/>additional combination data<br/>not in a figure</b> | IPM 32 + BDQ 0.25                     | 1                   | ---                                       | 2.79  | ---   |
|                                                                                                                                                                                                  |                                       | 2                   | ---                                       | 3.01  | ---   |
|                                                                                                                                                                                                  |                                       | 3                   | ---                                       | 2.79  | ---   |
|                                                                                                                                                                                                  | IPM 32 + BDQ 0.5                      | 1                   | ---                                       | 3.40  | 2.75  |
|                                                                                                                                                                                                  |                                       | 2                   | ---                                       | 3.45  | 2.81  |
|                                                                                                                                                                                                  |                                       | 3                   | ---                                       | 3.39  | 2.87  |
|                                                                                                                                                                                                  | IPM 32 + BDQ 1                        | 1                   | ---                                       | 2.85  | 2.26  |
|                                                                                                                                                                                                  |                                       | 2                   | ---                                       | 2.94  | 2.23  |
|                                                                                                                                                                                                  |                                       | 3                   | ---                                       | 2.86  | 2.00  |
| <b>ATCC 19977 WT,</b><br>Intracellular (THP-1 cells)<br>assay with MOI 1:10,<br>Biological replicate 3,<br><b>Fig. 9c; Fig. S11C,F; plus<br/>additional combination data<br/>not in a figure</b> | No drug                               | 1                   | 4.03                                      | 5.26  | 5.73  |
|                                                                                                                                                                                                  |                                       | 2                   | 3.97                                      | 4.78  | 6.03  |
|                                                                                                                                                                                                  |                                       | 3                   | 3.83                                      | 5.26  | ---   |
|                                                                                                                                                                                                  | BDQ 0.25                              | 1                   | ---                                       | 4.90  | 5.56  |
|                                                                                                                                                                                                  |                                       | 2                   | ---                                       | 5.00  | 5.60  |
|                                                                                                                                                                                                  |                                       | 3                   | ---                                       | 4.60  | 5.58  |
|                                                                                                                                                                                                  | BDQ 0.5                               | 1                   | ---                                       | 3.76  | 3.60  |
|                                                                                                                                                                                                  |                                       | 2                   | ---                                       | 4.07  | 3.38  |
|                                                                                                                                                                                                  |                                       | 3                   | ---                                       | 4.26  | 3.42  |
|                                                                                                                                                                                                  | BDQ 1                                 | 1                   | ---                                       | 3.32  | 2.18  |
|                                                                                                                                                                                                  |                                       | 2                   | ---                                       | 3.55  | 2.27  |
|                                                                                                                                                                                                  |                                       | 3                   | ---                                       | 3.20  | 2.39  |
|                                                                                                                                                                                                  | BDQ 4                                 | 1                   | ---                                       | 2.78  | 1.28  |
|                                                                                                                                                                                                  |                                       | 2                   | ---                                       | 3.11  | 1.84  |
|                                                                                                                                                                                                  |                                       | 3                   | ---                                       | 2.79  | 1.65  |
|                                                                                                                                                                                                  | IPM 8                                 | 1                   | ---                                       | 4.33  | 3.34  |
|                                                                                                                                                                                                  |                                       | 2                   | ---                                       | 4.20  | 3.51  |
|                                                                                                                                                                                                  |                                       | 3                   | ---                                       | 4.18  | 3.62  |
|                                                                                                                                                                                                  | IPM 16                                | 1                   | ---                                       | 2.30  | 1.83  |
|                                                                                                                                                                                                  |                                       | 2                   | ---                                       | 2.34  | 2.00  |
|                                                                                                                                                                                                  |                                       | 3                   | ---                                       | ---   | 2.05  |
|                                                                                                                                                                                                  | IPM 32                                | 1                   | ---                                       | 2.00  | 1.91  |
|                                                                                                                                                                                                  |                                       | 2                   | ---                                       | 1.91  | 1.94  |
|                                                                                                                                                                                                  |                                       | 3                   | ---                                       | 1.91  | 1.84  |
|                                                                                                                                                                                                  | IPM 64                                | 1                   | ---                                       | 2.00  | 0.48  |
|                                                                                                                                                                                                  |                                       | 2                   | ---                                       | 1.79  | 1.36  |
|                                                                                                                                                                                                  |                                       | 3                   | ---                                       | ---   | 1.65  |
|                                                                                                                                                                                                  | IPM 32 + BDQ 0.25                     | 1                   | ---                                       | 2.33  | 1.74  |
|                                                                                                                                                                                                  |                                       | 2                   | ---                                       | 2.54  | 2.52  |
|                                                                                                                                                                                                  |                                       | 3                   | ---                                       | 2.38  | 1.65  |
| IPM 64 + BDQ 0.5                                                                                                                                                                                 | 1                                     | ---                 | 2.31                                      | 3.20  |       |
|                                                                                                                                                                                                  | 2                                     | ---                 | 2.05                                      | ---   |       |
|                                                                                                                                                                                                  | 3                                     | ---                 | 2.31                                      | 3.00  |       |
| IPM 32 + BDQ 1                                                                                                                                                                                   | 1                                     | ---                 | 2.24                                      | ---   |       |
|                                                                                                                                                                                                  | 2                                     | ---                 | 2.40                                      | 1.61  |       |
|                                                                                                                                                                                                  | 3                                     | ---                 | 1.83                                      | 1.79  |       |
| IPM 64 + BDQ 4                                                                                                                                                                                   | 1                                     | ---                 | 1.83                                      | 1.46  |       |
|                                                                                                                                                                                                  | 2                                     | ---                 | 1.88                                      | 0.85  |       |
|                                                                                                                                                                                                  | 3                                     | ---                 | 1.92                                      | 1.11  |       |

Table continued on next page.

**Table S13, continued**

| Strain, condition, replicate, figure number                                                                                                     | Drug(s) and concentration(s) in µg/mL | Technical replicate | Intracellular log <sub>10</sub> CFU/mL at |       |       |
|-------------------------------------------------------------------------------------------------------------------------------------------------|---------------------------------------|---------------------|-------------------------------------------|-------|-------|
|                                                                                                                                                 |                                       |                     | Day 0                                     | Day 3 | Day 5 |
| <b>ATCC 19977 WT,</b><br>Intracellular (THP-1 cells)<br>assay with MOI 1:1,<br>Biological replicate 4,<br><b>Data not presented in a figure</b> | No drug                               | 1                   | 5.04                                      | 6.79  | nd    |
|                                                                                                                                                 |                                       | 2                   | 4.96                                      | 6.53  | nd    |
|                                                                                                                                                 | BDQ 0.0625                            | 1                   | ---                                       | 6.62  | nd    |
|                                                                                                                                                 |                                       | 2                   | ---                                       | 6.56  | nd    |
|                                                                                                                                                 | BDQ 1                                 | 1                   | ---                                       | 4.89  | nd    |
|                                                                                                                                                 |                                       | 2                   | ---                                       | 4.93  | nd    |
|                                                                                                                                                 | BDQ 2                                 | 1                   | ---                                       | 4.60  | nd    |
|                                                                                                                                                 |                                       | 2                   | ---                                       | 4.56  | nd    |
|                                                                                                                                                 | IPM 8                                 | 1                   | ---                                       | 5.06  | nd    |
|                                                                                                                                                 |                                       | 2                   | ---                                       | 5.30  | nd    |
|                                                                                                                                                 | IPM 16                                | 1                   | ---                                       | 5.15  | nd    |
|                                                                                                                                                 |                                       | 2                   | ---                                       | 5.15  | nd    |
|                                                                                                                                                 | IPM 32                                | 1                   | ---                                       | 4.96  | nd    |
|                                                                                                                                                 |                                       | 2                   | ---                                       | 5.10  | nd    |
|                                                                                                                                                 | IPM 32 + BDQ 1                        | 1                   | ---                                       | 4.20  | nd    |
|                                                                                                                                                 |                                       | 2                   | ---                                       | 4.38  | nd    |
|                                                                                                                                                 |                                       | 3                   | ---                                       | 4.48  | nd    |

--- indicates not applicable (Day 0) or sample lost (Days 3 or 5). nd, not determined.
